# Supplementary material
Source: publisher site journal article supplement (https://www.dovepress.com/get_supplementary_file.php?f=450399.docx)
Supplement: Supplementary file 1 [file get_supplementary_file.php]

**Supplementary materials**

**Supplementary Figures（1-4）:**

**Supplementary Figure 1.** Leave-one-out analysis visualizing the Mendelian randomization (MR) estimates of the different exposures (A: Type 1 diabetes; B: Type 2 diabetes; C: Body mass index) with the outcome (lichen sclerosus).


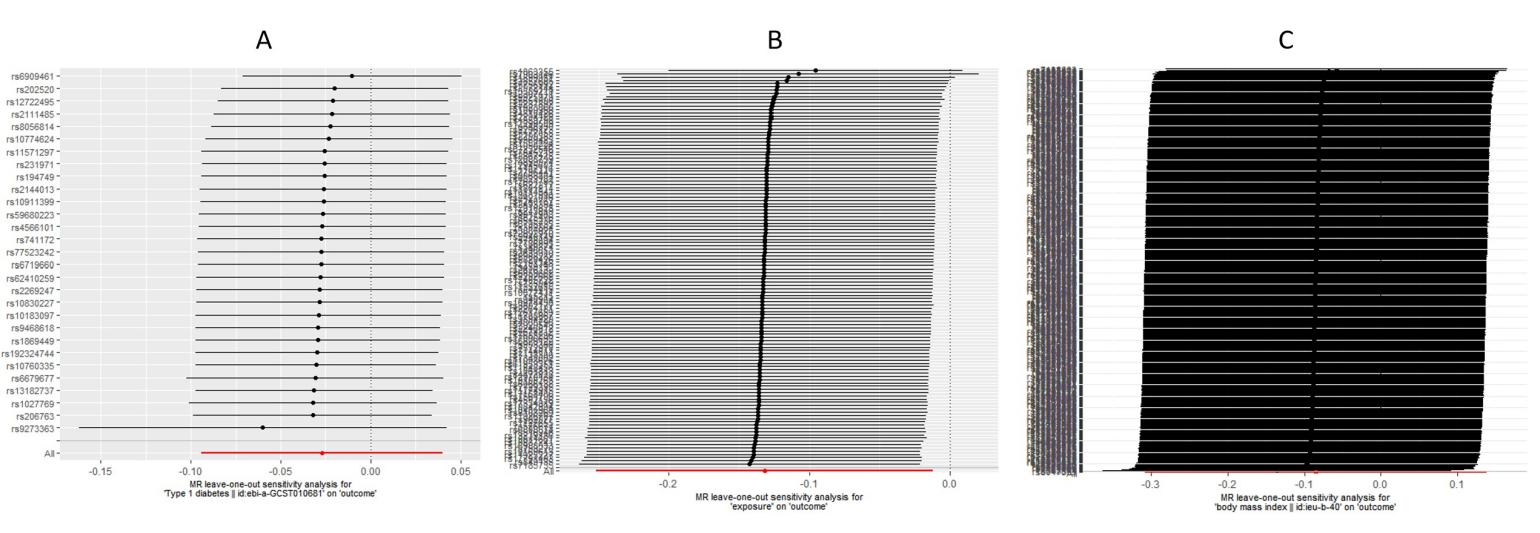


**Supplementary Figure 2.** A. The Radial MR method results between type 2 diabetes and lichen sclerosus. MR analysis results after removing outliers between type 2 diabetes and lichen sclerosus (B: scatter plots; C: funnel plots; D: leave-one-out analysis).
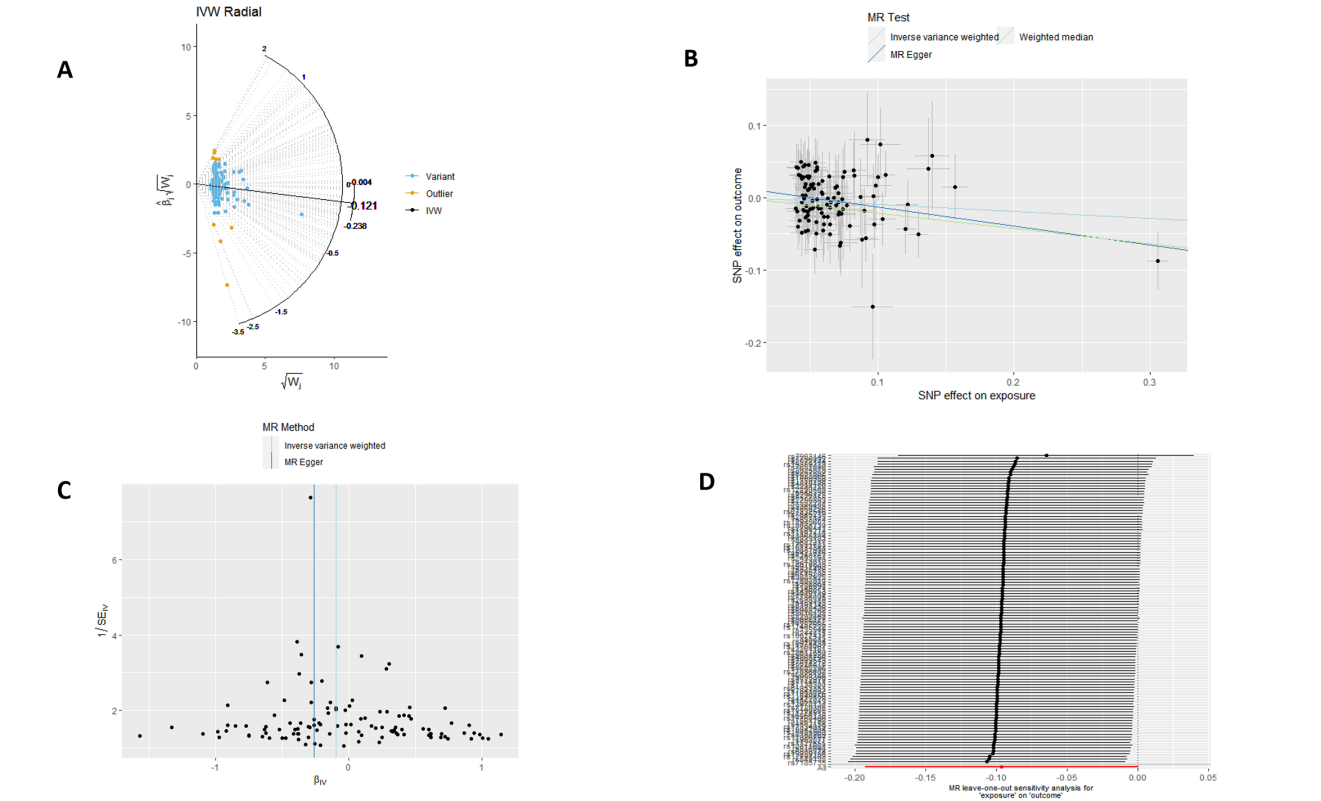


**Supplementary Figure 3.** Funnel plots visualizing the Mendelian randomization (MR) estimates of the different exposures (A: Type 1 diabetes; B: Type 2 diabetes; C: Body mass index) with the outcome (lichen sclerosus).


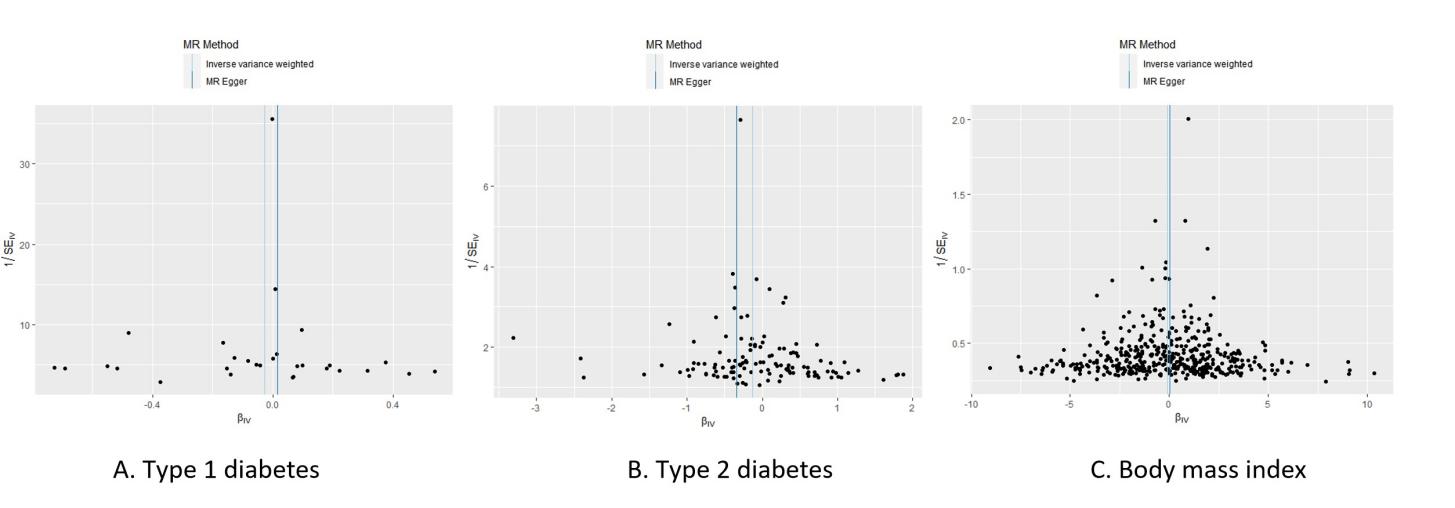


**Supplementary Figure 4.** Funnel plots visualizing the Mendelian randomization (MR) estimates of the exposure (lichen sclerosus) with different outcomes (A: Type 1 diabetes; B: Type 2 diabetes; C: Body mass index).


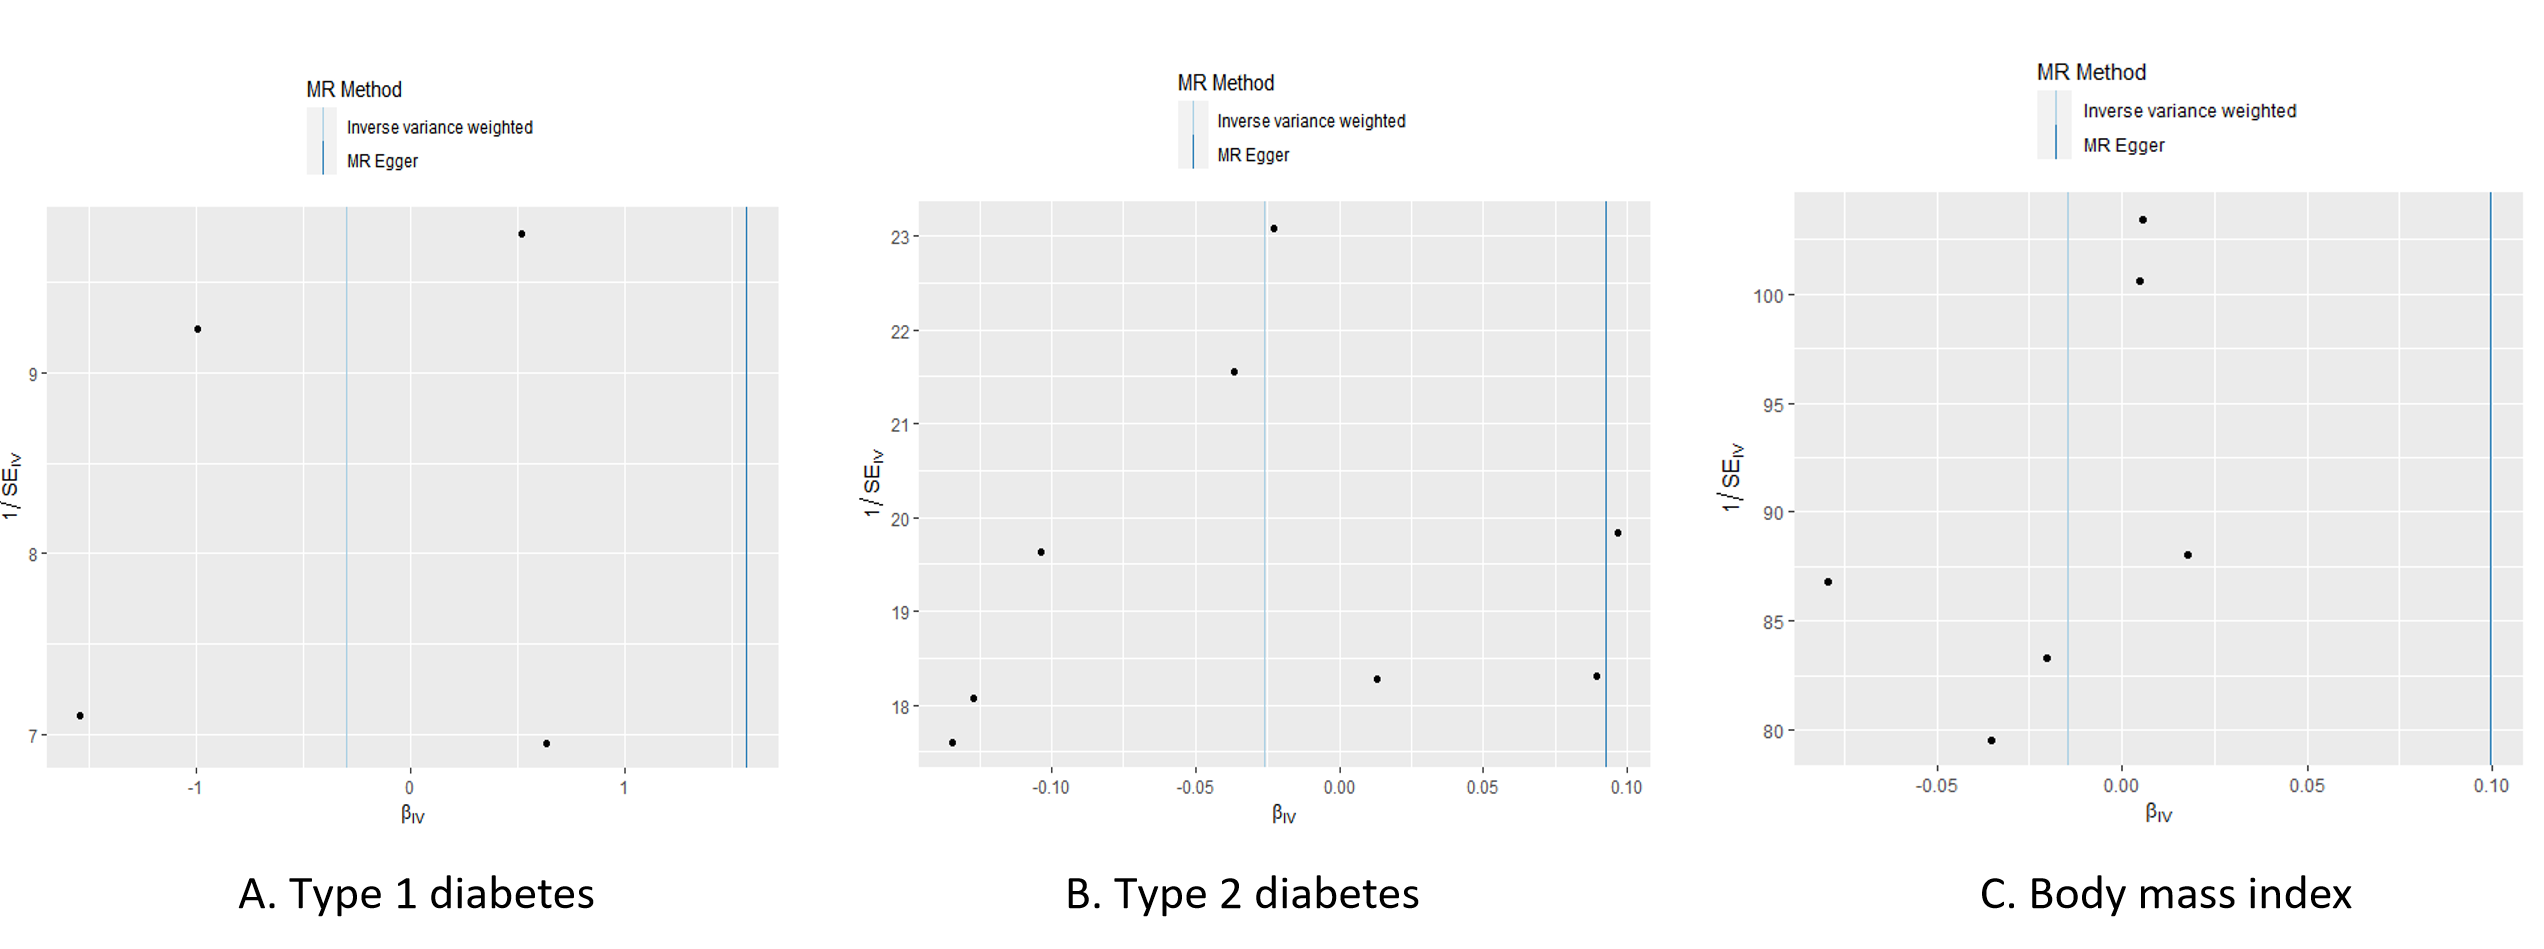


**Supplementary Tables（1-11）:**

**Supplementary Table 1. List of instrumental SNPs to calculate the effect estimates of T1D on LS.**

| SNP | A1 | A2 | Beta | EAF | P | SE | Chr | R2 | F |
| --- | --- | --- | --- | --- | --- | --- | --- | --- | --- |
| rs10183097 | C | T | 0.2053 | 0.1362 | 1.82E-10 | 0.0322 | 2 | 0.009917408 | 40.65052467 |
| rs1027769 | T | G | -0.9962 | 0.9966 | 3.52E-10 | 0.1588 | 3 | 0.006725474 | 39.35428973 |
| rs10760335 | G | A | 0.1357 | 0.3205 | 2.43E-08 | 0.0243 | 9 | 0.008020606 | 31.18510051 |
| rs10774624 | A | G | -0.2556 | 0.5037 | 1.34E-25 | 0.0244 | 12 | 0.032663891 | 109.7342112 |
| rs10830227 | A | G | 0.1582 | 0.5741 | 1.02E-11 | 0.0233 | 11 | 0.01223878 | 46.10002026 |
| rs10865468 | C | G | -0.1624 | 0.2527 | 4.66E-09 | 0.0277 | 2 | 0.009960985 | 34.3726101 |
| rs10911399 | G | A | -0.3707 | 0.0455 | 6.75E-09 | 0.064 | 1 | 0.011936101 | 33.54943604 |
| rs1131017 | G | C | -0.2461 | 0.5803 | 4.24E-25 | 0.0238 | 12 | 0.029501545 | 106.9225514 |
| rs11571297 | C | T | -0.1964 | 0.4844 | 1.11E-16 | 0.0237 | 2 | 0.019267706 | 68.67304029 |
| rs12722495 | C | T | -0.3145 | 0.1122 | 1.27E-14 | 0.0408 | 10 | 0.019705129 | 59.41840278 |
| rs13182737 | A | G | 0.1465 | 0.2553 | 1.49E-08 | 0.0259 | 5 | 0.008160888 | 31.994529 |
| rs17125653 | A | T | 0.2355 | 0.077 | 4.75E-09 | 0.0402 | 14 | 0.007883231 | 34.31861216 |
| rs1869449 | A | G | 0.1769 | 0.2967 | 4.55E-11 | 0.0269 | 2 | 0.013060019 | 43.24651401 |
| rs192324744 | G | T | 0.562 | 0.0131 | 1.36E-10 | 0.0875 | 2 | 0.008166709 | 41.25309388 |
| rs194749 | C | T | -0.1638 | 0.2455 | 5.37E-09 | 0.0281 | 14 | 0.009939591 | 33.9793569 |
| rs202520 | G | A | -0.1573 | 0.7222 | 7.97E-10 | 0.0256 | 20 | 0.009928352 | 37.75526428 |
| rs206763 | A | G | 0.6792 | 0.0202 | 2.93E-18 | 0.0779 | 6 | 0.018260563 | 76.01870012 |
| rs2071647 | A | T | 0.1526 | 0.2755 | 3.30E-09 | 0.0258 | 12 | 0.009296063 | 34.98401538 |
| rs2111485 | G | A | 0.1577 | 0.6033 | 1.89E-10 | 0.0248 | 2 | 0.01190389 | 40.43523998 |
| rs2144013 | G | A | 0.2234 | 0.2093 | 1.76E-12 | 0.0317 | 6 | 0.016518755 | 49.66469962 |
| rs2269247 | T | C | 0.1709 | 0.1804 | 7.28E-09 | 0.0295 | 1 | 0.008636795 | 33.5614019 |
| rs231971 | G | A | 0.2411 | 0.1026 | 1.55E-09 | 0.0399 | 16 | 0.010704289 | 36.51309351 |
| rs34296259 | A | T | 0.6637 | 0.0082 | 1.43E-08 | 0.1171 | 9 | 0.007164924 | 32.12401686 |
| rs34536443 | C | G | -0.4139 | 0.0515 | 4.84E-10 | 0.0665 | 19 | 0.01673653 | 38.73892476 |
| rs34954 | A | C | -0.4912 | 0.0443 | 1.25E-08 | 0.0863 | 5 | 0.020430172 | 32.39627858 |
| rs4566101 | C | T | 0.1755 | 0.2697 | 6.23E-12 | 0.0255 | 15 | 0.012132952 | 47.36678201 |
| rs506770 | C | G | 1.0048 | 0.768 | 3.33E-123 | 0.0426 | 6 | 0.35978119 | 556.3397033 |
| rs55996894 | C | G | -0.1785 | 0.204 | 3.13E-08 | 0.0323 | 14 | 0.010347839 | 30.5401662 |
| rs59680223 | T | C | 0.6421 | 0.0081 | 5.00E-10 | 0.1032 | 12 | 0.006625036 | 38.71202996 |
| rs62410259 | A | G | -0.3796 | 0.077 | 1.02E-12 | 0.0533 | 4 | 0.020482116 | 50.72218917 |
| rs6679677 | A | C | 0.6527 | 0.0993 | 3.42E-79 | 0.0346 | 1 | 0.076205555 | 355.8566023 |
| rs6719660 | G | A | 0.2918 | 0.9354 | 2.52E-08 | 0.0524 | 2 | 0.010290357 | 31.0104452 |
| rs689 | T | A | 0.7004 | 0.7109 | 2.30E-87 | 0.0354 | 11 | 0.201641016 | 391.4585209 |
| rs6909461 | C | A | -0.314 | 0.2529 | 3.06E-21 | 0.0332 | 6 | 0.03725777 | 89.45057338 |
| rs741172 | T | C | -0.2034 | 0.3205 | 3.11E-15 | 0.0258 | 16 | 0.018019776 | 62.15305571 |
| rs77523242 | C | T | -0.3705 | 0.0623 | 5.42E-09 | 0.0635 | 10 | 0.016038302 | 34.04309009 |
| rs8056814 | A | G | 0.2641 | 0.0793 | 1.99E-10 | 0.0415 | 16 | 0.010184932 | 40.49865583 |
| rs9273363 | A | C | 1.2786 | 0.3317 | 1.00E-200 | 0.0334 | 6 | 0.724796902 | 1465.468428 |
| rs9296062 | C | G | 0.6913 | 0.0509 | 1.37E-37 | 0.054 | 6 | 0.046173507 | 163.8874108 |
| rs9468618 | T | C | -0.3009 | 0.0975 | 7.53E-10 | 0.0489 | 6 | 0.015934051 | 37.86401445 |

**Supplementary Table 2. List of instrumental SNPs to calculate the effect estimates of T2D on LS.**

| SNP | A2 | Beta | EAF | SE | P | R2 | F |
| --- | --- | --- | --- | --- | --- | --- | --- |
| rs10077431 | C | -0.0487 | 0.214668 | 0.0089 | 4.75E-08 | 0.000799666 | 29.94180028 |
| rs10087241 | G | -0.0475 | 0.594893 | 0.008 | 2.80E-09 | 0.001087491 | 35.25390625 |
| rs1009358 | T | -0.0545 | 0.377278 | 0.008 | 9.81E-12 | 0.001395657 | 46.41015625 |
| rs10100265 | A | -0.0491 | 0.61049 | 0.0079 | 6.29E-10 | 0.001146542 | 38.62858516 |
| rs10114341 | T | -0.0409 | 0.440754 | 0.0072 | 1.15E-08 | 0.000824662 | 32.26871142 |
| rs10169613 | C | -0.0429 | 0.472134 | 0.0078 | 3.57E-08 | 0.000917347 | 30.25 |
| rs10401969 | T | 0.0921 | 0.076586 | 0.0133 | 4.13E-12 | 0.001199762 | 47.95302165 |
| rs1050226 | A | -0.0491 | 0.406792 | 0.0074 | 3.34E-11 | 0.001163516 | 44.02501826 |
| rs1061813 | G | -0.0429 | 0.537119 | 0.0073 | 3.37E-09 | 0.000915133 | 34.5357478 |
| rs1063355 | T | 0.0709 | 0.602436 | 0.0079 | 3.72E-19 | 0.002407911 | 80.54494472 |
| rs10811661 | T | -0.1569 | 0.173605 | 0.0098 | 4.13E-58 | 0.007063595 | 256.3266347 |
| rs10830963 | C | 0.0909 | 0.275768 | 0.008 | 5.85E-30 | 0.003300497 | 129.1064063 |
| rs10842994 | C | -0.0755 | 0.197025 | 0.0091 | 1.02E-16 | 0.001803629 | 68.83528559 |
| rs10974438 | A | 0.0591 | 0.351215 | 0.0075 | 3.01E-15 | 0.001591764 | 62.0944 |
| rs11048456 | C | -0.0488 | 0.756179 | 0.0082 | 2.97E-09 | 0.000878143 | 35.41701368 |
| rs11098676 | T | 0.054 | 0.787639 | 0.0096 | 2.03E-08 | 0.000975483 | 31.640625 |
| rs11107116 | G | 0.0467 | 0.219714 | 0.0085 | 3.75E-08 | 0.000747783 | 30.18532872 |
| rs11257655 | C | 0.0737 | 0.206773 | 0.0087 | 1.97E-17 | 0.001781789 | 71.76231999 |
| rs1127655 | C | -0.0438 | 0.529064 | 0.0079 | 2.47E-08 | 0.000955979 | 30.7393046 |
| rs11708067 | A | -0.0965 | 0.23899 | 0.0086 | 5.93E-29 | 0.003387308 | 125.9092753 |
| rs11774915 | C | 0.0495 | 0.337129 | 0.0086 | 8.73E-09 | 0.00109513 | 33.12939427 |
| rs11925227 | G | -0.0534 | 0.183439 | 0.0095 | 2.25E-08 | 0.000854265 | 31.59623269 |
| rs11926707 | T | 0.0463 | 0.625556 | 0.0082 | 1.69E-08 | 0.001004257 | 31.88117192 |
| rs12088739 | A | -0.0884 | 0.089848 | 0.013 | 9.79E-12 | 0.001278077 | 46.24 |
| rs12299509 | A | 0.0467 | 0.478622 | 0.0073 | 2.09E-10 | 0.001088452 | 40.92493901 |
| rs12617659 | C | -0.0685 | 0.147238 | 0.0103 | 2.83E-11 | 0.001178308 | 44.22895655 |
| rs12681990 | T | 0.0634 | 0.16373 | 0.0096 | 3.62E-11 | 0.001100736 | 43.61501736 |
| rs12910825 | A | 0.0517 | 0.360391 | 0.0074 | 2.16E-12 | 0.001232252 | 48.81099343 |
| rs12945601 | T | -0.048 | 0.613603 | 0.008 | 1.72E-09 | 0.001092531 | 36 |
| rs12970134 | G | 0.0555 | 0.26512 | 0.008 | 5.31E-12 | 0.001200259 | 48.12890625 |
| rs13239186 | C | 0.0539 | 0.302029 | 0.0085 | 2.70E-10 | 0.00122488 | 40.21051903 |
| rs1333039 | G | 0.0534 | 0.598788 | 0.0074 | 5.64E-13 | 0.001370123 | 52.07377648 |
| rs13389219 | C | -0.0722 | 0.394368 | 0.0074 | 2.11E-22 | 0.002490089 | 95.19430241 |
| rs1359790 | G | -0.0796 | 0.2867 | 0.008 | 2.80E-23 | 0.002591529 | 99.0025 |
| rs1496653 | A | -0.0769 | 0.204782 | 0.0088 | 2.57E-18 | 0.001926019 | 76.3637655 |
| rs1552224 | A | -0.1034 | 0.15421 | 0.0101 | 8.64E-25 | 0.002788985 | 104.8089403 |
| rs16988333 | A | -0.0745 | 0.090404 | 0.013 | 9.17E-09 | 0.000912807 | 32.84171598 |
| rs17086692 | G | -0.0467 | 0.313426 | 0.0084 | 2.48E-08 | 0.000938612 | 30.90830499 |
| rs17168486 | C | 0.0742 | 0.173603 | 0.0094 | 2.18E-15 | 0.001579733 | 62.30918968 |
| rs17334919 | C | -0.1398 | 0.100218 | 0.0128 | 6.69E-28 | 0.003524742 | 119.2873535 |
| rs17405722 | G | 0.087 | 0.074153 | 0.0146 | 2.28E-09 | 0.001039289 | 35.50853819 |
| rs17411031 | C | -0.045 | 0.261729 | 0.0081 | 3.04E-08 | 0.000782569 | 30.86419753 |
| rs17631783 | C | -0.0487 | 0.26346 | 0.0089 | 3.95E-08 | 0.000920447 | 29.94180028 |
| rs17791483 | A | -0.102 | 0.062588 | 0.0147 | 3.42E-12 | 0.001220821 | 48.14660558 |
| rs1801214 | C | 0.0903 | 0.599585 | 0.0074 | 5.52E-34 | 0.003915314 | 148.9059533 |
| rs1899951 | C | -0.1118 | 0.123288 | 0.0109 | 1.64E-24 | 0.002702037 | 105.2036024 |
| rs2191348 | G | 0.0652 | 0.546935 | 0.0073 | 3.44E-19 | 0.002106791 | 79.7718146 |
| rs2237892 | C | -0.096 | 0.06249 | 0.0157 | 8.75E-10 | 0.001079839 | 37.38894073 |
| rs2246012 | T | 0.0527 | 0.164823 | 0.0094 | 2.43E-08 | 0.000764623 | 31.4315301 |
| rs2261181 | C | 0.0985 | 0.09647 | 0.0118 | 9.18E-17 | 0.001691365 | 69.68004884 |
| rs2292662 | C | -0.0629 | 0.151272 | 0.0111 | 1.24E-08 | 0.001015917 | 32.11111111 |
| rs2294120 | A | -0.0443 | 0.455879 | 0.0079 | 1.62E-08 | 0.000973604 | 31.44512097 |
| rs2296173 | A | 0.065 | 0.212011 | 0.0087 | 7.66E-14 | 0.001411677 | 55.81979125 |
| rs2299383 | C | 0.0412 | 0.423455 | 0.0073 | 1.49E-08 | 0.000828829 | 31.85288047 |
| rs2307111 | T | -0.0407 | 0.39727 | 0.0074 | 3.03E-08 | 0.000793282 | 30.25 |
| rs2421016 | C | -0.0458 | 0.473761 | 0.0071 | 1.48E-10 | 0.001045932 | 41.611585 |
| rs243019 | T | 0.0566 | 0.455831 | 0.0071 | 2.29E-15 | 0.00158928 | 63.55008927 |
| rs244415 | G | -0.0467 | 0.412872 | 0.0079 | 3.88E-09 | 0.001057333 | 34.94456017 |
| rs2493394 | A | 0.073 | 0.107338 | 0.0113 | 1.15E-10 | 0.001021213 | 41.73388676 |
| rs2616132 | G | 0.0455 | 0.474257 | 0.0078 | 6.58E-09 | 0.001032381 | 34.02777778 |
| rs2633310 | G | -0.0443 | 0.435073 | 0.0079 | 2.37E-08 | 0.000964699 | 31.44512097 |
| rs2796441 | G | -0.0715 | 0.416458 | 0.0073 | 1.96E-22 | 0.002484765 | 95.93263276 |
| rs2820426 | A | 0.0521 | 0.610058 | 0.0073 | 1.30E-12 | 0.001291447 | 50.93657347 |
| rs2857605 | C | 0.0672 | 0.789389 | 0.009 | 5.90E-14 | 0.001501553 | 55.75111111 |
| rs2867125 | T | 0.0601 | 0.827825 | 0.0096 | 4.33E-10 | 0.001029645 | 39.19281684 |
| rs2908282 | G | 0.0552 | 0.177395 | 0.0094 | 4.25E-09 | 0.000889285 | 34.48438207 |
| rs2925979 | T | -0.0534 | 0.70085 | 0.0078 | 9.06E-12 | 0.001195712 | 46.86982249 |
| rs2972144 | A | 0.0913 | 0.645367 | 0.0075 | 2.55E-34 | 0.003815553 | 148.1900444 |
| rs302864 | G | 0.071 | 0.087026 | 0.0127 | 2.46E-08 | 0.00080104 | 31.25426251 |
| rs340874 | T | 0.0626 | 0.563904 | 0.0073 | 8.41E-18 | 0.001927374 | 73.5364984 |
| rs348330 | G | -0.0487 | 0.633451 | 0.0081 | 1.86E-09 | 0.001101369 | 36.14830056 |
| rs3802177 | G | -0.1217 | 0.311281 | 0.008 | 2.32E-52 | 0.006350469 | 231.4201563 |
| rs3887925 | C | 0.0474 | 0.553172 | 0.0079 | 2.47E-09 | 0.001110676 | 36 |
| rs4472028 | T | -0.0453 | 0.55575 | 0.0071 | 2.08E-10 | 0.001013289 | 40.70799445 |
| rs4502156 | T | -0.0411 | 0.435857 | 0.0073 | 1.66E-08 | 0.000830705 | 31.69844248 |
| rs459193 | A | 0.0711 | 0.745338 | 0.0083 | 8.81E-18 | 0.001919051 | 73.38089708 |
| rs4810426 | C | 0.0726 | 0.096789 | 0.013 | 2.15E-08 | 0.000921549 | 31.18792899 |
| rs4823182 | A | 0.0482 | 0.335748 | 0.0077 | 3.36E-10 | 0.001036264 | 39.18434812 |
| rs4865796 | G | 0.053 | 0.69309 | 0.0078 | 1.33E-11 | 0.00119504 | 46.17028271 |
| rs4932143 | G | -0.0568 | 0.720944 | 0.0087 | 5.51E-11 | 0.001298134 | 42.62438895 |
| rs516946 | T | 0.0824 | 0.760633 | 0.0085 | 3.16E-22 | 0.002472429 | 93.97591696 |
| rs5215 | C | -0.0678 | 0.639941 | 0.0073 | 2.09E-20 | 0.002118376 | 86.26083693 |
| rs576674 | G | -0.0654 | 0.832515 | 0.0097 | 1.79E-11 | 0.001192761 | 45.45817834 |
| rs6059662 | A | 0.0446 | 0.663176 | 0.0079 | 1.51E-08 | 0.000888652 | 31.87245634 |
| rs6066138 | G | -0.049 | 0.278362 | 0.0082 | 1.93E-09 | 0.000964609 | 35.70791196 |
| rs61953351 | G | -0.07 | 0.249902 | 0.0091 | 1.98E-14 | 0.00183702 | 59.17159763 |
| rs622217 | T | -0.0485 | 0.483932 | 0.0077 | 3.13E-10 | 0.00117491 | 39.67363805 |
| rs6515236 | A | -0.0504 | 0.24933 | 0.0091 | 3.34E-08 | 0.000950856 | 30.67455621 |
| rs67232546 | C | 0.0596 | 0.209222 | 0.0096 | 4.66E-10 | 0.001175397 | 38.54340278 |
| rs6795735 | C | -0.0558 | 0.410912 | 0.0073 | 1.63E-14 | 0.001507396 | 58.42822293 |
| rs6808574 | T | 0.0552 | 0.609626 | 0.0076 | 4.39E-13 | 0.001450282 | 52.7534626 |
| rs6878122 | G | -0.0564 | 0.681791 | 0.0079 | 1.19E-12 | 0.001380231 | 50.96875501 |
| rs7138300 | C | -0.0443 | 0.556835 | 0.0072 | 5.65E-10 | 0.000968566 | 37.85667438 |
| rs7144011 | G | 0.0482 | 0.221063 | 0.0085 | 1.64E-08 | 0.000800097 | 32.15557093 |
| rs7177055 | G | 0.0647 | 0.718289 | 0.0079 | 2.75E-16 | 0.00169411 | 67.0740266 |
| rs7185735 | A | 0.1056 | 0.397306 | 0.0073 | 1.59E-47 | 0.005340474 | 209.2580221 |
| rs7240767 | T | 0.0451 | 0.383677 | 0.0081 | 2.16E-08 | 0.00096196 | 31.00152416 |
| rs72892910 | G | 0.0648 | 0.172394 | 0.0099 | 6.43E-11 | 0.00119819 | 42.84297521 |
| rs735949 | T | -0.0711 | 0.14115 | 0.0106 | 1.95E-11 | 0.001225653 | 44.99118904 |
| rs753270 | T | 0.0528 | 0.583535 | 0.0079 | 2.70E-11 | 0.001355012 | 44.66976446 |
| rs7561798 | A | 0.04 | 0.482171 | 0.0072 | 2.79E-08 | 0.000798983 | 30.86419753 |
| rs7572970 | A | 0.059 | 0.722047 | 0.0087 | 1.39E-11 | 0.001397239 | 45.99022328 |
| rs7651090 | A | 0.1204 | 0.313377 | 0.0076 | 3.85E-57 | 0.006238331 | 250.9722992 |
| rs7674212 | G | -0.0465 | 0.408864 | 0.0075 | 6.18E-10 | 0.001045207 | 38.44 |
| rs7685296 | C | -0.0511 | 0.279365 | 0.0081 | 2.32E-10 | 0.001051379 | 39.79896357 |
| rs7729395 | C | 0.1373 | 0.050941 | 0.016 | 1.10E-17 | 0.001822769 | 73.63785156 |
| rs7756992 | A | 0.1297 | 0.266896 | 0.0078 | 6.00E-62 | 0.006582905 | 276.4972058 |
| rs7786095 | A | -0.0743 | 0.10386 | 0.0129 | 9.64E-09 | 0.001027618 | 33.174028 |
| rs780094 | T | 0.0692 | 0.612845 | 0.0074 | 5.16E-21 | 0.002272363 | 87.4477721 |
| rs7841082 | C | -0.042 | 0.438276 | 0.0077 | 4.94E-08 | 0.000868559 | 29.75206612 |
| rs7845219 | T | -0.0422 | 0.492786 | 0.0072 | 4.54E-09 | 0.000890235 | 34.35262346 |
| rs7903146 | C | 0.3059 | 0.291585 | 0.0077 | 1.00E-200 | 0.038658222 | 1578.256198 |
| rs7923866 | C | -0.0972 | 0.378775 | 0.0074 | 9.34E-40 | 0.004446239 | 172.531775 |
| rs7929543 | A | 0.0828 | 0.08316 | 0.0138 | 2.20E-09 | 0.001045439 | 36 |
| rs8068804 | G | 0.0587 | 0.325097 | 0.0078 | 4.41E-14 | 0.00151203 | 56.63527285 |
| rs8108269 | T | 0.0644 | 0.281015 | 0.0079 | 3.11E-16 | 0.001675911 | 66.45345297 |
| rs825476 | C | 0.0524 | 0.580549 | 0.0073 | 6.80E-13 | 0.00133725 | 51.52486395 |
| rs849135 | G | -0.0999 | 0.499052 | 0.0072 | 1.04E-43 | 0.004989987 | 192.515625 |
| rs853974 | T | -0.0601 | 0.737586 | 0.0088 | 7.86E-12 | 0.00139823 | 46.64269112 |
| rs9369425 | G | -0.0546 | 0.708185 | 0.0085 | 1.13E-10 | 0.001232167 | 41.2617301 |
| rs940904 | G | 0.0499 | 0.743373 | 0.0083 | 2.08E-09 | 0.000950036 | 36.14472347 |
| rs963740 | A | -0.0479 | 0.294299 | 0.0086 | 2.23E-08 | 0.000953039 | 31.02230936 |
| rs982077 | A | -0.0453 | 0.565521 | 0.0072 | 2.58E-10 | 0.001008426 | 39.58506944 |
| rs9844972 | G | 0.0956 | 0.069723 | 0.0148 | 1.03E-10 | 0.001185589 | 41.72461651 |
| rs9894220 | A | -0.0585 | 0.43374 | 0.0079 | 1.52E-13 | 0.001681075 | 54.83496235 |
| rs9911983 | C | 0.0397 | 0.566573 | 0.0073 | 4.82E-08 | 0.000774075 | 29.57571777 |
| rs993380 | A | -0.0507 | 0.66555 | 0.0081 | 4.59E-10 | 0.001144347 | 39.17832647 |
| rs9940149 | G | -0.058 | 0.178556 | 0.0095 | 9.29E-10 | 0.000986821 | 37.27423823 |

**Supplementary Table 3. List of instrumental SNPs to calculate the effect estimates of BMI on LS.**

| SNP | A1 | A2 | Beta | EAF | SE | P | R2 | F |
| --- | --- | --- | --- | --- | --- | --- | --- | --- |
| rs10009336 | T | C | -0.014 | 0.1638 | 0.0022 | 2.20E-10 | 5.37E-05 | 40.49586777 |
| rs1006896 | C | A | -0.0234 | 0.1061 | 0.0027 | 5.50E-18 | 0.000103864 | 75.11111111 |
| rs10132280 | A | C | -0.0223 | 0.3017 | 0.0018 | 5.60E-35 | 0.000209535 | 153.4845679 |
| rs10169594 | C | T | 0.0121 | 0.3596 | 0.0018 | 2.00E-11 | 6.74E-05 | 45.1882716 |
| rs10182181 | G | A | 0.0325 | 0.4753 | 0.0016 | 6.70E-90 | 0.000526836 | 412.5976563 |
| rs10192119 | G | T | 0.0166 | 0.1673 | 0.0022 | 3.00E-14 | 7.68E-05 | 56.9338843 |
| rs10197031 | C | T | 0.0166 | 0.2834 | 0.0019 | 1.90E-18 | 0.000111924 | 76.33240997 |
| rs10243319 | C | T | -0.0107 | 0.3939 | 0.0018 | 1.20E-09 | 5.47E-05 | 35.33641975 |
| rs10247983 | A | G | 0.0201 | 0.9213 | 0.0033 | 1.70E-09 | 5.86E-05 | 37.09917355 |
| rs10248136 | T | C | -0.0097 | 0.5142 | 0.0017 | 2.00E-08 | 4.70E-05 | 32.55709343 |
| rs10269783 | A | G | 0.0133 | 0.3896 | 0.0017 | 1.40E-15 | 8.41E-05 | 61.20761246 |
| rs10408324 | T | C | -0.0124 | 0.2744 | 0.0019 | 9.50E-11 | 6.12E-05 | 42.59279778 |
| rs10478110 | C | A | 0.01 | 0.4348 | 0.0017 | 9.60E-09 | 4.91E-05 | 34.60207612 |
| rs1048932 | A | C | -0.016 | 0.4162 | 0.0017 | 3.80E-22 | 0.000124405 | 88.58131488 |
| rs10492229 | T | C | 0.0142 | 0.2268 | 0.0019 | 7.70E-14 | 7.07E-05 | 55.85595568 |
| rs10510419 | T | G | -0.0177 | 0.1416 | 0.0023 | 2.20E-14 | 7.62E-05 | 59.22306238 |
| rs10518694 | A | C | 0.0146 | 0.1424 | 0.0025 | 3.30E-09 | 5.21E-05 | 34.1056 |
| rs1064213 | A | G | 0.012 | 0.492 | 0.0017 | 2.40E-12 | 7.20E-05 | 49.82698962 |
| rs10733051 | G | A | -0.0097 | 0.4802 | 0.0016 | 2.90E-09 | 4.70E-05 | 36.75390625 |
| rs10742752 | C | T | 0.0124 | 0.6159 | 0.0017 | 1.10E-13 | 7.27E-05 | 53.20415225 |
| rs10747488 | A | C | -0.0123 | 0.7601 | 0.002 | 1.20E-09 | 5.52E-05 | 37.8225 |
| rs10750215 | T | G | 0.0108 | 0.3883 | 0.0017 | 1.30E-10 | 5.54E-05 | 40.35986159 |
| rs1075901 | C | T | 0.0121 | 0.5639 | 0.0016 | 1.20E-13 | 7.20E-05 | 57.19140625 |
| rs10768994 | C | T | -0.0114 | 0.4337 | 0.0017 | 6.40E-12 | 6.38E-05 | 44.96885813 |
| rs10795422 | G | A | 0.0139 | 0.6905 | 0.0019 | 9.30E-14 | 8.26E-05 | 53.52077562 |
| rs10811871 | G | A | -0.0108 | 0.3829 | 0.0018 | 1.60E-09 | 5.51E-05 | 36 |
| rs10832778 | G | C | 0.0125 | 0.6222 | 0.0017 | 1.30E-13 | 7.35E-05 | 54.06574394 |
| rs10858334 | G | C | 0.0143 | 0.1415 | 0.0026 | 2.70E-08 | 4.97E-05 | 30.25 |
| rs10867256 | T | C | -0.0118 | 0.553 | 0.0017 | 8.70E-12 | 6.88E-05 | 48.1799308 |
| rs10878946 | T | C | -0.0141 | 0.714 | 0.0019 | 3.60E-13 | 8.12E-05 | 55.07202216 |
| rs10887578 | C | G | 0.0128 | 0.4896 | 0.0017 | 1.60E-13 | 8.19E-05 | 56.69204152 |
| rs10914462 | G | A | -0.0112 | 0.4255 | 0.0017 | 1.50E-10 | 6.13E-05 | 43.40484429 |
| rs10915840 | A | G | -0.0118 | 0.283 | 0.0019 | 1.30E-09 | 5.65E-05 | 38.57063712 |
| rs10920678 | G | A | -0.0155 | 0.5709 | 0.0016 | 1.50E-21 | 0.00011771 | 93.84765625 |
| rs10938397 | G | A | 0.0324 | 0.4317 | 0.0016 | 3.40E-86 | 0.000515086 | 410.0625 |
| rs10942267 | G | A | -0.0156 | 0.3088 | 0.0019 | 3.90E-17 | 0.000103887 | 67.41274238 |
| rs10953740 | G | A | -0.0153 | 0.5534 | 0.0017 | 1.00E-18 | 0.00011571 | 81 |
| rs10962550 | C | G | 0.0182 | 0.1801 | 0.0022 | 6.20E-16 | 9.78E-05 | 68.43801653 |
| rs10968114 | C | A | -0.0113 | 0.4681 | 0.0017 | 6.10E-11 | 6.36E-05 | 44.183391 |
| rs10971709 | T | C | 0.0132 | 0.2062 | 0.0021 | 6.20E-10 | 5.70E-05 | 39.51020408 |
| rs10984756 | G | C | 0.0174 | 0.1048 | 0.0029 | 1.10E-09 | 5.68E-05 | 36 |
| rs11030618 | T | C | 0.011 | 0.5679 | 0.0017 | 2.40E-10 | 5.94E-05 | 41.86851211 |
| rs11066188 | A | G | -0.012 | 0.4181 | 0.0017 | 8.10E-13 | 7.01E-05 | 49.82698962 |
| rs11084553 | G | A | -0.021 | 0.1518 | 0.0024 | 1.80E-18 | 0.000113563 | 76.5625 |
| rs11105839 | A | T | -0.0109 | 0.3799 | 0.0017 | 1.10E-10 | 5.60E-05 | 41.11072664 |
| rs11115176 | C | T | -0.0121 | 0.2399 | 0.0019 | 2.00E-10 | 5.34E-05 | 40.5567867 |
| rs11118308 | G | A | -0.0101 | 0.4703 | 0.0016 | 4.80E-10 | 5.08E-05 | 39.84765625 |
| rs1112613 | A | G | -0.0133 | 0.1762 | 0.0023 | 3.40E-09 | 5.14E-05 | 33.43856333 |
| rs11150911 | C | A | -0.0133 | 0.7191 | 0.0018 | 4.70E-13 | 7.15E-05 | 54.59567901 |
| rs11165643 | T | C | 0.0206 | 0.5828 | 0.0017 | 1.40E-35 | 0.000206361 | 146.8373702 |
| rs11170468 | C | A | -0.0123 | 0.2326 | 0.0019 | 1.90E-10 | 5.40E-05 | 41.90858726 |
| rs11173522 | A | C | 0.0128 | 0.2078 | 0.0021 | 1.10E-09 | 5.39E-05 | 37.15192744 |
| rs11185111 | A | G | -0.0129 | 0.3042 | 0.0019 | 7.70E-12 | 7.04E-05 | 46.09695291 |
| rs11251352 | G | A | 0.0109 | 0.5988 | 0.0018 | 7.00E-10 | 5.71E-05 | 36.66975309 |
| rs1144387 | C | G | 0.0098 | 0.5714 | 0.0017 | 1.60E-08 | 4.70E-05 | 33.23183391 |
| rs11496125 | T | C | 0.0169 | 0.4212 | 0.0017 | 3.00E-22 | 0.000139258 | 98.82698962 |
| rs11505821 | T | A | 0.0311 | 0.0601 | 0.0035 | 2.70E-19 | 0.000109271 | 78.95591837 |
| rs11538 | G | A | 0.0135 | 0.1805 | 0.0023 | 3.30E-09 | 5.39E-05 | 34.45179584 |
| rs1158805 | A | C | -0.0137 | 0.3766 | 0.0018 | 1.20E-14 | 8.81E-05 | 57.92901235 |
| rs11609659 | C | T | -0.0154 | 0.2371 | 0.002 | 2.20E-14 | 8.58E-05 | 59.29 |
| rs11611246 | T | G | 0.024 | 0.21 | 0.002 | 5.00E-32 | 0.000191117 | 144 |
| rs11615578 | T | C | 0.013 | 0.2474 | 0.002 | 8.10E-11 | 6.29E-05 | 42.25 |
| rs11656076 | A | G | -0.0142 | 0.2254 | 0.0021 | 5.60E-12 | 7.04E-05 | 45.72335601 |
| rs11672660 | T | C | -0.034 | 0.2049 | 0.0021 | 1.70E-60 | 0.000376662 | 262.1315193 |
| rs11713193 | A | G | 0.0239 | 0.5073 | 0.0017 | 2.40E-44 | 0.000285544 | 197.650519 |
| rs11736228 | T | A | -0.0139 | 0.2587 | 0.002 | 4.10E-12 | 7.41E-05 | 48.3025 |
| rs11738695 | A | C | 0.0097 | 0.586 | 0.0017 | 2.00E-08 | 4.57E-05 | 32.55709343 |
| rs11739877 | T | C | 0.0117 | 0.6118 | 0.0018 | 6.60E-11 | 6.50E-05 | 42.25 |
| rs11781699 | C | T | 0.0132 | 0.1896 | 0.0021 | 3.10E-10 | 5.35E-05 | 39.51020408 |
| rs11855853 | T | C | -0.0145 | 0.2649 | 0.002 | 2.40E-13 | 8.19E-05 | 52.5625 |
| rs1187352 | C | T | 0.0119 | 0.6518 | 0.0018 | 6.00E-11 | 6.43E-05 | 43.70679012 |
| rs11880870 | G | A | -0.0189 | 0.4801 | 0.0017 | 1.00E-28 | 0.000178322 | 123.6020761 |
| rs11889536 | G | A | -0.0189 | 0.1493 | 0.0024 | 6.40E-15 | 9.07E-05 | 62.015625 |
| rs11908637 | A | G | -0.012 | 0.236 | 0.0021 | 4.90E-09 | 5.19E-05 | 32.65306122 |
| rs11945861 | A | G | -0.0148 | 0.2369 | 0.002 | 5.00E-13 | 7.92E-05 | 54.76 |
| rs11951673 | T | C | -0.0123 | 0.3941 | 0.0017 | 1.10E-13 | 7.23E-05 | 52.34948097 |
| rs12041258 | C | T | -0.0146 | 0.2287 | 0.002 | 9.50E-13 | 7.52E-05 | 53.29 |
| rs12044597 | G | A | 0.0143 | 0.5029 | 0.0016 | 1.70E-18 | 0.000102242 | 79.87890625 |
| rs12049202 | T | C | 0.024 | 0.203 | 0.0022 | 1.00E-28 | 0.000186383 | 119.0082645 |
| rs12098284 | T | C | 0.0178 | 0.1241 | 0.0026 | 1.80E-11 | 6.89E-05 | 46.86982249 |
| rs12150665 | C | T | -0.0162 | 0.4058 | 0.0017 | 1.60E-22 | 0.000126562 | 90.80968858 |
| rs1218822 | A | G | 0.0168 | 0.6663 | 0.0017 | 1.90E-22 | 0.000125509 | 97.66089965 |
| rs12299814 | A | C | -0.0157 | 0.2525 | 0.002 | 5.20E-15 | 9.30E-05 | 61.6225 |
| rs12328930 | C | T | 0.0098 | 0.4235 | 0.0017 | 1.80E-08 | 4.69E-05 | 33.23183391 |
| rs12334877 | A | G | -0.0144 | 0.198 | 0.0022 | 7.70E-11 | 6.59E-05 | 42.84297521 |
| rs12364470 | G | T | 0.0178 | 0.1626 | 0.0022 | 1.10E-15 | 8.63E-05 | 65.46280992 |
| rs12369179 | T | C | -0.0359 | 0.08782 | 0.0031 | 2.50E-31 | 0.000206487 | 134.1113424 |
| rs12416812 | A | G | 0.0111 | 0.5088 | 0.0016 | 6.10E-12 | 6.16E-05 | 48.12890625 |
| rs1241986 | A | G | -0.0139 | 0.8479 | 0.0024 | 1.10E-08 | 4.98E-05 | 33.54340278 |
| rs12422552 | C | G | -0.0134 | 0.2663 | 0.002 | 1.60E-11 | 7.02E-05 | 44.89 |
| rs12429545 | A | G | 0.0316 | 0.1248 | 0.0025 | 9.60E-38 | 0.000218135 | 159.7696 |
| rs12448257 | A | G | 0.0184 | 0.218 | 0.002 | 8.10E-20 | 0.000115433 | 84.64 |
| rs12546578 | A | T | 0.0146 | 0.7246 | 0.002 | 1.00E-13 | 8.51E-05 | 53.29 |
| rs12564992 | G | A | 0.0196 | 0.1144 | 0.0026 | 5.30E-14 | 7.78E-05 | 56.82840237 |
| rs12593036 | G | A | -0.0154 | 0.2993 | 0.0019 | 3.80E-16 | 9.95E-05 | 65.69529086 |
| rs12602912 | T | C | 0.0176 | 0.2048 | 0.0021 | 9.90E-18 | 0.000100893 | 70.24036281 |
| rs1260326 | C | T | 0.0105 | 0.5973 | 0.0017 | 3.90E-10 | 5.30E-05 | 38.14878893 |
| rs12629015 | G | A | -0.0135 | 0.1852 | 0.0023 | 2.10E-09 | 5.50E-05 | 34.45179584 |
| rs1266874 | G | A | 0.014 | 0.3558 | 0.0018 | 9.80E-15 | 8.98E-05 | 60.49382716 |
| rs12675063 | T | A | 0.0156 | 0.1131 | 0.0026 | 1.30E-09 | 4.88E-05 | 36 |
| rs1268065 | A | G | -0.0102 | 0.4794 | 0.0017 | 1.00E-09 | 5.19E-05 | 36 |
| rs12680842 | G | A | -0.0133 | 0.3205 | 0.0018 | 4.40E-14 | 7.70E-05 | 54.59567901 |
| rs12718572 | T | C | -0.0117 | 0.4024 | 0.0018 | 3.00E-11 | 6.58E-05 | 42.25 |
| rs12762034 | C | T | 0.024 | 0.07583 | 0.0032 | 7.30E-14 | 8.07E-05 | 56.25 |
| rs12779328 | T | C | 0.0105 | 0.2833 | 0.0019 | 4.50E-08 | 4.48E-05 | 30.5401662 |
| rs1285997 | G | C | 0.0142 | 0.7153 | 0.0019 | 1.20E-13 | 8.21E-05 | 55.85595568 |
| rs12888545 | G | A | 0.0136 | 0.2519 | 0.002 | 9.10E-12 | 6.97E-05 | 46.24 |
| rs12888955 | A | G | -0.0178 | 0.6513 | 0.0018 | 1.40E-22 | 0.000143914 | 97.79012346 |
| rs12905439 | G | C | -0.0118 | 0.3393 | 0.0018 | 1.40E-10 | 6.24E-05 | 42.97530864 |
| rs12914489 | A | G | 0.0165 | 0.1103 | 0.0026 | 3.80E-10 | 5.34E-05 | 40.27366864 |
| rs12922346 | C | G | 0.0136 | 0.2657 | 0.002 | 1.00E-11 | 7.22E-05 | 46.24 |
| rs12933482 | G | A | 0.0186 | 0.1048 | 0.0028 | 4.90E-11 | 6.49E-05 | 44.12755102 |
| rs12936083 | G | A | 0.0139 | 0.3267 | 0.0019 | 4.10E-13 | 8.50E-05 | 53.52077562 |
| rs12939549 | G | A | -0.018 | 0.4335 | 0.0016 | 2.70E-28 | 0.000159134 | 126.5625 |
| rs1296328 | C | A | -0.0179 | 0.5657 | 0.0018 | 4.90E-24 | 0.000157439 | 98.89197531 |
| rs12981256 | A | G | 0.0142 | 0.5325 | 0.0018 | 1.10E-15 | 0.000100394 | 62.2345679 |
| rs13021737 | G | A | 0.0574 | 0.8319 | 0.0021 | 7.50E-157 | 0.000921494 | 747.1111111 |
| rs13047416 | G | C | -0.0154 | 0.3769 | 0.0018 | 2.20E-17 | 0.000111392 | 73.19753086 |
| rs13069244 | A | G | 0.0187 | 0.07747 | 0.0032 | 3.00E-09 | 5.00E-05 | 34.14941406 |
| rs13107325 | T | C | 0.047 | 0.07373 | 0.0032 | 1.10E-47 | 0.000301722 | 215.7226563 |
| rs13110266 | A | G | -0.0117 | 0.4065 | 0.0017 | 1.90E-12 | 6.61E-05 | 47.36678201 |
| rs13132853 | G | A | -0.0142 | 0.3452 | 0.0018 | 4.70E-15 | 9.12E-05 | 62.2345679 |
| rs13147390 | C | T | 0.0103 | 0.3569 | 0.0018 | 1.00E-08 | 4.87E-05 | 32.74382716 |
| rs13174863 | G | A | 0.0192 | 0.1548 | 0.0023 | 2.90E-16 | 9.65E-05 | 69.68620038 |
| rs13184896 | T | G | -0.0133 | 0.4346 | 0.0016 | 3.30E-16 | 8.69E-05 | 69.09765625 |
| rs13191362 | G | A | -0.0236 | 0.1198 | 0.0025 | 5.90E-21 | 0.000117461 | 89.1136 |
| rs1320903 | A | G | 0.0216 | 0.3174 | 0.0018 | 9.20E-32 | 0.000202167 | 144 |
| rs1321432 | C | A | 0.0201 | 0.6321 | 0.0018 | 3.50E-29 | 0.000187905 | 124.6944444 |
| rs13250058 | T | G | 0.0112 | 0.6771 | 0.0018 | 2.90E-10 | 5.49E-05 | 38.71604938 |
| rs13263601 | C | A | 0.0154 | 0.3478 | 0.0018 | 2.20E-17 | 0.000107592 | 73.19753086 |
| rs1327259 | G | A | -0.0155 | 0.3872 | 0.0018 | 1.70E-18 | 0.000114011 | 74.15123457 |
| rs13287131 | C | T | 0.0123 | 0.2491 | 0.002 | 6.80E-10 | 5.66E-05 | 37.8225 |
| rs1330052 | G | C | 0.0132 | 0.3504 | 0.0018 | 1.50E-13 | 7.93E-05 | 53.77777778 |
| rs13329567 | T | C | -0.0293 | 0.2308 | 0.002 | 1.00E-50 | 0.000304818 | 214.6225 |
| rs1365466 | T | C | -0.0137 | 0.7406 | 0.0019 | 3.30E-13 | 7.21E-05 | 51.99168975 |
| rs1371108 | A | C | 0.0119 | 0.3247 | 0.0018 | 9.00E-11 | 6.21E-05 | 43.70679012 |
| rs138289 | T | A | -0.0103 | 0.4829 | 0.0017 | 3.30E-09 | 5.30E-05 | 36.70934256 |
| rs1409818 | T | C | 0.0201 | 0.1156 | 0.0029 | 2.50E-12 | 8.26E-05 | 48.039239 |
| rs1412235 | C | G | 0.0246 | 0.3175 | 0.0017 | 6.00E-45 | 0.000262269 | 209.3979239 |
| rs1421334 | C | A | -0.0125 | 0.5431 | 0.0018 | 1.00E-12 | 7.75E-05 | 48.22530864 |
| rs1430387 | C | T | -0.0114 | 0.4295 | 0.0017 | 5.80E-11 | 6.37E-05 | 44.96885813 |
| rs1431659 | G | A | -0.0196 | 0.7344 | 0.0019 | 6.00E-24 | 0.000149866 | 106.4155125 |
| rs1436344 | C | G | 0.0141 | 0.5922 | 0.0017 | 4.10E-16 | 9.60E-05 | 68.79238754 |
| rs1445652 | A | G | 0.0123 | 0.1855 | 0.0022 | 4.30E-08 | 4.57E-05 | 31.25826446 |
| rs1452075 | T | C | 0.0141 | 0.7277 | 0.0018 | 1.30E-14 | 7.88E-05 | 61.36111111 |
| rs1454687 | G | C | -0.0202 | 0.5227 | 0.0017 | 5.20E-32 | 0.000203599 | 141.1903114 |
| rs1465900 | C | A | -0.0125 | 0.2188 | 0.002 | 4.80E-10 | 5.34E-05 | 39.0625 |
| rs1472169 | T | C | -0.0139 | 0.3772 | 0.0018 | 2.80E-15 | 9.08E-05 | 59.63271605 |
| rs1476322 | A | G | 0.0101 | 0.569 | 0.0017 | 5.00E-09 | 5.00E-05 | 35.29757785 |
| rs1477199 | G | A | 0.0228 | 0.1451 | 0.0024 | 9.40E-22 | 0.000128968 | 90.25 |
| rs1492767 | T | C | 0.0094 | 0.4957 | 0.0016 | 1.00E-08 | 4.42E-05 | 34.515625 |
| rs1503526 | C | T | 0.014 | 0.4838 | 0.0017 | 5.50E-17 | 9.79E-05 | 67.8200692 |
| rs1521527 | C | G | -0.0121 | 0.5324 | 0.0017 | 3.10E-12 | 7.29E-05 | 50.66089965 |
| rs1522569 | G | T | -0.0164 | 0.1819 | 0.0022 | 2.90E-13 | 8.00E-05 | 55.57024793 |
| rs1528435 | T | C | 0.0164 | 0.6331 | 0.0017 | 9.10E-23 | 0.00012495 | 93.06574394 |
| rs1535660 | C | T | -0.0147 | 0.8554 | 0.0025 | 5.20E-09 | 5.35E-05 | 34.5744 |
| rs1538247 | C | T | 0.0108 | 0.3181 | 0.0019 | 1.00E-08 | 5.06E-05 | 32.31024931 |
| rs1552893 | G | A | -0.0126 | 0.2777 | 0.0019 | 8.10E-11 | 6.37E-05 | 43.97783934 |
| rs156201 | C | G | 0.0123 | 0.7606 | 0.002 | 5.80E-10 | 5.51E-05 | 37.8225 |
| rs1624134 | C | G | 0.0101 | 0.4068 | 0.0018 | 1.10E-08 | 4.92E-05 | 31.4845679 |
| rs1656377 | C | T | 0.0099 | 0.5885 | 0.0017 | 1.60E-08 | 4.75E-05 | 33.91349481 |
| rs1681740 | C | A | -0.0115 | 0.3933 | 0.0018 | 1.10E-10 | 6.31E-05 | 40.81790123 |
| rs16849710 | G | A | -0.0116 | 0.515 | 0.0018 | 6.00E-11 | 6.72E-05 | 41.5308642 |
| rs16851483 | T | G | 0.0369 | 0.06928 | 0.0035 | 3.20E-26 | 0.000175594 | 111.1518367 |
| rs16871902 | A | G | 0.0125 | 0.4877 | 0.0017 | 4.60E-13 | 7.81E-05 | 54.06574394 |
| rs16903285 | C | T | 0.0331 | 0.1407 | 0.0026 | 7.60E-38 | 0.000264926 | 162.0724852 |
| rs17001561 | A | G | 0.0151 | 0.1573 | 0.0023 | 3.80E-11 | 6.04E-05 | 43.1020794 |
| rs17014375 | G | T | 0.0172 | 0.1348 | 0.0025 | 1.10E-11 | 6.90E-05 | 47.3344 |
| rs17033117 | T | C | 0.0137 | 0.1872 | 0.0022 | 8.90E-10 | 5.71E-05 | 38.77892562 |
| rs17056301 | C | T | 0.0118 | 0.2636 | 0.002 | 2.40E-09 | 5.41E-05 | 34.81 |
| rs17113297 | T | C | 0.0166 | 0.2082 | 0.0021 | 2.10E-15 | 9.09E-05 | 62.48526077 |
| rs17119937 | C | T | 0.0212 | 0.06905 | 0.0036 | 5.60E-09 | 5.78E-05 | 34.67901235 |
| rs17203016 | G | A | 0.015 | 0.196 | 0.002 | 2.10E-13 | 7.09E-05 | 56.25 |
| rs17207196 | T | C | -0.0221 | 0.4118 | 0.0018 | 2.10E-35 | 0.000236606 | 150.7438272 |
| rs17238110 | G | A | -0.0353 | 0.1634 | 0.005 | 2.00E-12 | 0.000340682 | 49.8436 |
| rs17311369 | T | C | -0.0104 | 0.3278 | 0.0019 | 3.10E-08 | 4.77E-05 | 29.96121884 |
| rs17399237 | C | T | -0.0129 | 0.5497 | 0.0017 | 6.70E-14 | 8.24E-05 | 57.58131488 |
| rs17405819 | C | T | -0.0215 | 0.301 | 0.0018 | 4.30E-33 | 0.000194514 | 142.6697531 |
| rs17424296 | A | G | -0.0108 | 0.3659 | 0.0018 | 2.40E-09 | 5.41E-05 | 36 |
| rs17425707 | C | T | 0.0167 | 0.1003 | 0.0028 | 4.40E-09 | 5.03E-05 | 35.57270408 |
| rs17446257 | A | G | 0.0153 | 0.1292 | 0.0026 | 2.90E-09 | 5.27E-05 | 34.62869822 |
| rs17499593 | G | C | 0.0125 | 0.1897 | 0.0022 | 1.10E-08 | 4.80E-05 | 32.28305785 |
| rs17513613 | C | T | 0.0186 | 0.3236 | 0.0018 | 3.60E-26 | 0.00015145 | 106.7777778 |
| rs175165 | G | T | -0.0103 | 0.3941 | 0.0018 | 5.20E-09 | 5.07E-05 | 32.74382716 |
| rs17535749 | A | G | 0.015 | 0.1023 | 0.0027 | 2.50E-08 | 4.13E-05 | 30.86419753 |
| rs17551974 | A | C | -0.0141 | 0.1782 | 0.0022 | 1.90E-10 | 5.82E-05 | 41.07644628 |
| rs17636031 | C | T | 0.016 | 0.2701 | 0.0019 | 1.20E-17 | 0.000100939 | 70.91412742 |
| rs17663412 | A | C | 0.0157 | 0.1139 | 0.0027 | 6.10E-09 | 4.98E-05 | 33.81207133 |
| rs17710386 | C | T | 0.0126 | 0.3319 | 0.0018 | 1.00E-12 | 7.04E-05 | 49 |
| rs17724992 | G | A | -0.0183 | 0.2596 | 0.0019 | 1.00E-22 | 0.000128737 | 92.76731302 |
| rs17789218 | C | T | 0.013 | 0.2392 | 0.0019 | 7.40E-12 | 6.15E-05 | 46.81440443 |
| rs17806379 | T | C | -0.0258 | 0.1789 | 0.0022 | 1.50E-30 | 0.000195558 | 137.5289256 |
| rs1784460 | A | T | 0.0132 | 0.4035 | 0.0018 | 9.00E-14 | 8.39E-05 | 53.77777778 |
| rs1804528 | A | G | 0.0109 | 0.3507 | 0.002 | 3.00E-08 | 5.41E-05 | 29.7025 |
| rs1830074 | C | T | 0.0115 | 0.288 | 0.0019 | 1.40E-09 | 5.42E-05 | 36.63434903 |
| rs1836303 | G | A | 0.0116 | 0.3873 | 0.0018 | 5.30E-11 | 6.39E-05 | 41.5308642 |
| rs1843328 | A | C | -0.0099 | 0.5085 | 0.0017 | 7.90E-09 | 4.90E-05 | 33.91349481 |
| rs1863652 | A | G | -0.0115 | 0.3449 | 0.0018 | 1.40E-10 | 5.98E-05 | 40.81790123 |
| rs1884389 | T | C | -0.0103 | 0.4289 | 0.0017 | 4.00E-09 | 5.20E-05 | 36.70934256 |
| rs1885728 | A | G | 0.0108 | 0.6787 | 0.0019 | 1.00E-08 | 5.09E-05 | 32.31024931 |
| rs1891216 | G | T | 0.0107 | 0.3759 | 0.0018 | 2.40E-09 | 5.37E-05 | 35.33641975 |
| rs1896767 | A | G | -0.0109 | 0.5376 | 0.0017 | 2.40E-10 | 5.91E-05 | 41.11072664 |
| rs189843 | C | G | -0.0098 | 0.5557 | 0.0017 | 1.70E-08 | 4.74E-05 | 33.23183391 |
| rs1927790 | C | T | 0.0148 | 0.4109 | 0.0016 | 1.80E-19 | 0.000106042 | 85.5625 |
| rs1928295 | C | T | -0.0141 | 0.4461 | 0.0016 | 5.40E-18 | 9.82E-05 | 77.66015625 |
| rs1937683 | T | C | 0.0109 | 0.6699 | 0.0018 | 3.20E-09 | 5.25E-05 | 36.66975309 |
| rs1948080 | G | T | -0.0137 | 0.3749 | 0.0018 | 1.10E-14 | 8.80E-05 | 57.92901235 |
| rs1982441 | T | G | 0.0175 | 0.1381 | 0.0026 | 7.00E-12 | 7.29E-05 | 45.30325444 |
| rs1982725 | T | C | 0.0097 | 0.4778 | 0.0017 | 3.30E-08 | 4.70E-05 | 32.55709343 |
| rs1993709 | G | A | 0.0331 | 0.8177 | 0.0021 | 1.90E-57 | 0.000326638 | 248.4376417 |
| rs2007231 | T | C | -0.0104 | 0.6387 | 0.0018 | 5.20E-09 | 4.99E-05 | 33.38271605 |
| rs200810 | C | T | -0.0136 | 0.3716 | 0.0017 | 5.50E-16 | 8.64E-05 | 64 |
| rs2009416 | T | C | -0.0121 | 0.361 | 0.0018 | 1.10E-11 | 6.75E-05 | 45.1882716 |
| rs2033529 | G | A | 0.0205 | 0.2936 | 0.0018 | 1.90E-30 | 0.000174319 | 129.7067901 |
| rs2051559 | C | T | 0.0176 | 0.1308 | 0.0026 | 5.00E-12 | 7.04E-05 | 45.82248521 |
| rs2065418 | G | T | -0.0166 | 0.3623 | 0.0018 | 3.60E-20 | 0.00012733 | 85.04938272 |
| rs208015 | C | T | -0.0356 | 0.9216 | 0.0034 | 1.40E-25 | 0.000183142 | 109.633218 |
| rs2124499 | C | G | -0.0123 | 0.3718 | 0.0017 | 3.40E-13 | 7.07E-05 | 52.34948097 |
| rs2143253 | A | G | -0.0188 | 0.1189 | 0.0026 | 1.10E-12 | 7.41E-05 | 52.28402367 |
| rs215634 | G | A | -0.0152 | 0.6212 | 0.0018 | 2.60E-17 | 0.000108732 | 71.30864198 |
| rs2162524 | C | T | 0.0155 | 0.3321 | 0.0018 | 4.10E-17 | 0.00010658 | 74.15123457 |
| rs2163188 | C | G | 0.0131 | 0.474 | 0.0017 | 2.00E-14 | 8.56E-05 | 59.38062284 |
| rs2174307 | C | G | 0.0121 | 0.4067 | 0.0017 | 4.90E-12 | 7.07E-05 | 50.66089965 |
| rs217671 | G | A | 0.0144 | 0.2719 | 0.0019 | 1.30E-13 | 8.21E-05 | 57.44044321 |
| rs2228213 | A | G | -0.0139 | 0.3481 | 0.0017 | 4.60E-16 | 8.77E-05 | 66.85467128 |
| rs2235564 | T | C | 0.0131 | 0.3466 | 0.0018 | 3.70E-13 | 7.77E-05 | 52.96604938 |
| rs2246012 | C | T | 0.0158 | 0.1628 | 0.0022 | 3.10E-13 | 6.80E-05 | 51.5785124 |
| rs226000 | T | C | 0.0119 | 0.8245 | 0.0022 | 3.60E-08 | 4.10E-05 | 29.25826446 |
| rs2283093 | T | C | 0.0127 | 0.2066 | 0.0021 | 3.10E-09 | 5.29E-05 | 36.57369615 |
| rs2284746 | G | C | -0.0104 | 0.5238 | 0.0017 | 1.40E-09 | 5.40E-05 | 37.42560554 |
| rs2285178 | C | T | 0.0112 | 0.3109 | 0.0019 | 9.40E-09 | 5.37E-05 | 34.74792244 |
| rs2306537 | G | A | 0.0133 | 0.3092 | 0.0019 | 8.70E-13 | 7.56E-05 | 49 |
| rs2307111 | C | T | -0.0265 | 0.3962 | 0.0016 | 1.60E-58 | 0.000335992 | 274.3164063 |
| rs2317299 | C | T | -0.0106 | 0.5597 | 0.0017 | 1.30E-09 | 5.54E-05 | 38.87889273 |
| rs2325036 | C | A | -0.0181 | 0.3845 | 0.0017 | 3.60E-27 | 0.000155064 | 113.3598616 |
| rs2357760 | A | G | 0.0145 | 0.6754 | 0.0017 | 6.80E-17 | 9.22E-05 | 72.75086505 |
| rs2361988 | C | T | -0.0155 | 0.2539 | 0.002 | 5.20E-15 | 9.10E-05 | 60.0625 |
| rs2365389 | T | C | -0.0174 | 0.4143 | 0.0017 | 1.30E-25 | 0.000146933 | 104.7612457 |
| rs2367112 | G | T | -0.0119 | 0.4919 | 0.0016 | 2.30E-13 | 7.08E-05 | 55.31640625 |
| rs2411182 | A | G | 0.0123 | 0.6943 | 0.0019 | 7.70E-11 | 6.42E-05 | 41.90858726 |
| rs2423668 | C | T | -0.0105 | 0.5505 | 0.0019 | 2.80E-08 | 5.46E-05 | 30.5401662 |
| rs2425840 | C | A | 0.0119 | 0.4059 | 0.0018 | 1.60E-11 | 6.83E-05 | 43.70679012 |
| rs2429150 | C | A | 0.0111 | 0.4164 | 0.0018 | 2.70E-10 | 5.99E-05 | 38.02777778 |
| rs2479958 | G | A | -0.0154 | 0.5075 | 0.0018 | 1.50E-17 | 0.000118553 | 73.19753086 |
| rs2481665 | C | T | -0.0161 | 0.4408 | 0.0016 | 7.20E-23 | 0.000127788 | 101.2539063 |
| rs2543132 | C | G | 0.0146 | 0.8134 | 0.0022 | 5.00E-11 | 6.47E-05 | 44.04132231 |
| rs2600226 | T | C | -0.0116 | 0.6697 | 0.0019 | 3.70E-10 | 5.95E-05 | 37.27423823 |
| rs2605603 | A | G | -0.0103 | 0.4887 | 0.0016 | 2.50E-10 | 5.30E-05 | 41.44140625 |
| rs2608703 | A | C | 0.0142 | 0.4546 | 0.0017 | 1.90E-16 | 1.00E-04 | 69.7716263 |
| rs262130 | T | C | 0.0127 | 0.1969 | 0.0023 | 1.80E-08 | 5.10E-05 | 30.48960302 |
| rs2643452 | A | T | 0.0136 | 0.5448 | 0.0017 | 4.70E-15 | 9.17E-05 | 64 |
| rs2693826 | A | G | -0.0137 | 0.4421 | 0.0017 | 2.00E-15 | 9.26E-05 | 64.94463668 |
| rs2694047 | G | A | 0.0188 | 0.747 | 0.002 | 3.90E-21 | 0.000133594 | 88.36 |
| rs273504 | G | A | 0.0153 | 0.4266 | 0.0018 | 4.40E-18 | 0.000114523 | 72.25 |
| rs2744974 | T | C | 0.0249 | 0.338 | 0.0018 | 1.40E-45 | 0.000277462 | 191.3611111 |
| rs2791653 | G | A | -0.0141 | 0.7577 | 0.0019 | 1.30E-13 | 7.30E-05 | 55.07202216 |
| rs2820311 | G | A | 0.0235 | 0.3369 | 0.0018 | 4.10E-38 | 0.000246744 | 170.4475309 |
| rs2832283 | A | G | 0.0115 | 0.2208 | 0.002 | 5.80E-09 | 4.55E-05 | 33.0625 |
| rs2836964 | C | T | -0.011 | 0.3576 | 0.0018 | 1.30E-09 | 5.56E-05 | 37.34567901 |
| rs2861683 | C | A | -0.0144 | 0.407 | 0.0017 | 1.30E-16 | 0.000100093 | 71.75086505 |
| rs2868975 | A | G | -0.0143 | 0.178 | 0.0023 | 2.20E-10 | 5.98E-05 | 38.65595463 |
| rs287104 | A | G | 0.0115 | 0.6604 | 0.0017 | 4.40E-11 | 5.93E-05 | 45.76124567 |
| rs2875762 | C | G | 0.0139 | 0.2473 | 0.002 | 1.20E-11 | 7.19E-05 | 48.3025 |
| rs2907948 | A | G | -0.0141 | 0.2427 | 0.0019 | 1.30E-13 | 7.31E-05 | 55.07202216 |
| rs2931434 | T | C | -0.0104 | 0.3168 | 0.0018 | 1.40E-08 | 4.68E-05 | 33.38271605 |
| rs2943465 | C | T | 0.0248 | 0.9444 | 0.0039 | 2.00E-10 | 6.46E-05 | 40.4365549 |
| rs294704 | T | G | -0.0113 | 0.7239 | 0.0019 | 4.00E-09 | 5.10E-05 | 35.37119114 |
| rs3007105 | T | C | 0.0142 | 0.4697 | 0.0017 | 1.10E-17 | 0.00010045 | 69.7716263 |
| rs326896 | T | C | -0.0128 | 0.3925 | 0.0018 | 2.80E-13 | 7.81E-05 | 50.56790123 |
| rs331966 | C | A | 0.0112 | 0.3792 | 0.0018 | 3.20E-10 | 5.91E-05 | 38.71604938 |
| rs33500 | T | C | -0.0167 | 0.8082 | 0.0022 | 4.30E-14 | 8.65E-05 | 57.62190083 |
| rs339991 | G | A | 0.0124 | 0.5631 | 0.0018 | 1.20E-12 | 7.57E-05 | 47.45679012 |
| rs349088 | A | C | -0.0128 | 0.4976 | 0.0017 | 1.80E-13 | 8.19E-05 | 56.69204152 |
| rs355777 | C | G | 0.0153 | 0.4106 | 0.0017 | 1.40E-18 | 0.000113303 | 81 |
| rs3731695 | C | T | 0.0116 | 0.5582 | 0.0016 | 7.90E-13 | 6.64E-05 | 52.5625 |
| rs3732084 | C | T | 0.0107 | 0.6139 | 0.0018 | 1.10E-09 | 5.43E-05 | 35.33641975 |
| rs3736485 | G | A | -0.0134 | 0.5443 | 0.0016 | 2.50E-16 | 8.91E-05 | 70.140625 |
| rs3749897 | T | C | 0.0122 | 0.4172 | 0.0018 | 8.40E-12 | 7.24E-05 | 45.9382716 |
| rs3754963 | T | A | -0.0123 | 0.2574 | 0.002 | 3.30E-10 | 5.78E-05 | 37.8225 |
| rs3764835 | A | G | -0.0141 | 0.1528 | 0.0024 | 3.10E-09 | 5.15E-05 | 34.515625 |
| rs3772882 | A | C | 0.0127 | 0.3661 | 0.0018 | 6.60E-13 | 7.49E-05 | 49.7808642 |
| rs3800229 | T | G | 0.0175 | 0.7123 | 0.0018 | 1.40E-22 | 0.000125519 | 94.52160494 |
| rs3800637 | C | T | 0.0115 | 0.336 | 0.0018 | 5.10E-10 | 5.90E-05 | 40.81790123 |
| rs3806114 | A | G | -0.0113 | 0.6773 | 0.0018 | 3.40E-10 | 5.58E-05 | 39.41049383 |
| rs3806572 | A | G | -0.0145 | 0.2788 | 0.0019 | 1.60E-14 | 8.46E-05 | 58.24099723 |
| rs3807645 | A | G | -0.0166 | 0.221 | 0.0021 | 2.40E-15 | 9.49E-05 | 62.48526077 |
| rs380857 | A | C | -0.0151 | 0.8878 | 0.0027 | 3.60E-08 | 4.54E-05 | 31.27709191 |
| rs3814883 | T | C | 0.0232 | 0.4764 | 0.0017 | 1.10E-40 | 0.00026852 | 186.2422145 |
| rs3828783 | A | G | -0.0165 | 0.1809 | 0.0021 | 5.60E-15 | 8.07E-05 | 61.73469388 |
| rs3829849 | T | C | 0.0098 | 0.3589 | 0.0017 | 5.90E-09 | 4.42E-05 | 33.23183391 |
| rs38314 | A | G | -0.012 | 0.4912 | 0.0017 | 4.70E-12 | 7.20E-05 | 49.82698962 |
| rs3844598 | G | A | 0.0095 | 0.521 | 0.0017 | 3.80E-08 | 4.50E-05 | 31.2283737 |
| rs3904244 | A | T | 0.0155 | 0.1377 | 0.0025 | 4.30E-10 | 5.71E-05 | 38.44 |
| rs391300 | C | T | -0.0119 | 0.6275 | 0.0017 | 3.10E-12 | 6.62E-05 | 49 |
| rs3935648 | G | C | -0.0125 | 0.2328 | 0.0022 | 6.80E-09 | 5.58E-05 | 32.28305785 |
| rs3977755 | T | C | -0.0135 | 0.2804 | 0.0019 | 5.90E-13 | 7.35E-05 | 50.48476454 |
| rs40067 | A | G | -0.0266 | 0.1713 | 0.0023 | 7.10E-30 | 0.000200885 | 133.7542533 |
| rs4012234 | G | T | 0.0141 | 0.5924 | 0.0018 | 9.90E-16 | 9.60E-05 | 61.36111111 |
| rs4072917 | A | G | 0.0115 | 0.4694 | 0.0018 | 6.90E-11 | 6.59E-05 | 40.81790123 |
| rs4148155 | G | A | -0.0188 | 0.1127 | 0.0026 | 5.00E-13 | 7.07E-05 | 52.28402367 |
| rs4148866 | T | C | 0.0098 | 0.4068 | 0.0018 | 4.00E-08 | 4.64E-05 | 29.64197531 |
| rs4237643 | G | T | -0.0223 | 0.6938 | 0.0019 | 4.30E-33 | 0.00021129 | 137.7534626 |
| rs427943 | C | A | 0.017 | 0.5669 | 0.0017 | 7.30E-23 | 0.000141913 | 100 |
| rs429343 | G | A | -0.015 | 0.5813 | 0.0017 | 6.80E-18 | 0.000109526 | 77.85467128 |
| rs4307239 | G | A | 0.0115 | 0.4578 | 0.0017 | 3.90E-11 | 6.57E-05 | 45.76124567 |
| rs4358081 | C | A | 0.0097 | 0.4631 | 0.0017 | 1.50E-08 | 4.68E-05 | 32.55709343 |
| rs4414033 | A | G | 0.0129 | 0.627 | 0.0018 | 1.40E-12 | 7.78E-05 | 51.36111111 |
| rs4430672 | C | T | -0.0127 | 0.8004 | 0.0022 | 3.90E-09 | 5.15E-05 | 33.32438017 |
| rs4482463 | A | C | -0.0331 | 0.9213 | 0.0033 | 2.80E-23 | 0.000158877 | 100.6069789 |
| rs4495304 | C | T | -0.0194 | 0.067 | 0.0033 | 5.00E-09 | 4.71E-05 | 34.56014692 |
| rs4516268 | A | C | -0.0217 | 0.1925 | 0.0021 | 5.20E-25 | 0.000146394 | 106.7777778 |
| rs4518345 | A | G | -0.0117 | 0.2842 | 0.0019 | 1.00E-09 | 5.57E-05 | 37.91966759 |
| rs4556997 | A | C | 0.0197 | 0.1349 | 0.0024 | 6.90E-17 | 9.06E-05 | 67.37673611 |
| rs4589691 | G | C | 0.0141 | 0.1579 | 0.0024 | 4.70E-09 | 5.29E-05 | 34.515625 |
| rs4639527 | G | A | 0.0172 | 0.3012 | 0.0019 | 3.30E-20 | 0.000124536 | 81.9501385 |
| rs4653017 | T | C | 0.0122 | 0.6818 | 0.0018 | 4.50E-11 | 6.46E-05 | 45.9382716 |
| rs4660443 | T | C | 0.0164 | 0.2218 | 0.0021 | 6.80E-15 | 9.28E-05 | 60.98866213 |
| rs4722398 | T | C | 0.0158 | 0.1336 | 0.0025 | 3.60E-10 | 5.78E-05 | 39.9424 |
| rs4740619 | C | T | -0.0186 | 0.4521 | 0.0016 | 2.30E-30 | 0.000171392 | 135.140625 |
| rs4757144 | A | G | 0.0169 | 0.5878 | 0.0018 | 5.60E-22 | 0.000138402 | 88.15123457 |
| rs4783830 | A | G | -0.0105 | 0.3074 | 0.0019 | 2.40E-08 | 4.69E-05 | 30.5401662 |
| rs4786903 | G | A | 0.0125 | 0.7368 | 0.002 | 3.50E-10 | 6.06E-05 | 39.0625 |
| rs4800191 | C | G | 0.0103 | 0.6369 | 0.0017 | 2.50E-09 | 4.91E-05 | 36.70934256 |
| rs4813619 | T | G | -0.0108 | 0.5101 | 0.0018 | 2.30E-09 | 5.83E-05 | 36 |
| rs4818225 | G | A | 0.0117 | 0.6606 | 0.0018 | 2.30E-10 | 6.14E-05 | 42.25 |
| rs4820408 | G | T | -0.0151 | 0.592 | 0.0017 | 2.10E-19 | 0.000110145 | 78.89619377 |
| rs4842491 | T | C | 0.0098 | 0.7138 | 0.0018 | 4.00E-08 | 3.92E-05 | 29.64197531 |
| rs4851029 | G | T | 0.0121 | 0.5247 | 0.0017 | 1.70E-12 | 7.30E-05 | 50.66089965 |
| rs4858193 | C | T | -0.0129 | 0.2779 | 0.0019 | 1.60E-11 | 6.68E-05 | 46.09695291 |
| rs486359 | C | G | 0.0112 | 0.4853 | 0.0017 | 1.60E-11 | 6.27E-05 | 43.40484429 |
| rs4864201 | C | T | -0.0141 | 0.6469 | 0.0017 | 1.50E-16 | 9.08E-05 | 68.79238754 |
| rs4880341 | T | C | -0.0118 | 0.5606 | 0.0017 | 1.10E-11 | 6.86E-05 | 48.1799308 |
| rs4906908 | G | T | 0.0103 | 0.5253 | 0.0017 | 2.50E-09 | 5.29E-05 | 36.70934256 |
| rs491711 | C | A | -0.0115 | 0.316 | 0.0019 | 1.10E-09 | 5.72E-05 | 36.63434903 |
| rs4929923 | C | T | 0.0181 | 0.6376 | 0.0017 | 7.20E-27 | 0.000151399 | 113.3598616 |
| rs4936175 | C | T | 0.0122 | 0.4445 | 0.0017 | 1.40E-12 | 7.35E-05 | 51.5017301 |
| rs4937870 | G | A | -0.0109 | 0.3172 | 0.0019 | 8.80E-09 | 5.15E-05 | 32.91135734 |
| rs4952843 | G | A | -0.0131 | 0.3807 | 0.0018 | 6.80E-14 | 8.09E-05 | 52.96604938 |
| rs4954638 | C | A | -0.0118 | 0.2492 | 0.002 | 2.90E-09 | 5.21E-05 | 34.81 |
| rs4968656 | G | A | 0.0116 | 0.3216 | 0.0019 | 8.20E-10 | 5.87E-05 | 37.27423823 |
| rs4981693 | A | G | 0.0206 | 0.771 | 0.002 | 6.90E-24 | 0.000149849 | 106.09 |
| rs4986044 | T | C | -0.0164 | 0.4687 | 0.0016 | 3.30E-23 | 0.000133953 | 105.0625 |
| rs538579 | C | G | 0.0137 | 0.3228 | 0.0019 | 1.30E-13 | 8.21E-05 | 51.99168975 |
| rs543874 | G | A | 0.0475 | 0.1952 | 0.002 | 1.20E-122 | 0.0007089 | 564.0625 |
| rs559231 | T | G | 0.0135 | 0.3956 | 0.0018 | 2.40E-14 | 8.72E-05 | 56.25 |
| rs577525 | C | T | 0.0166 | 0.5676 | 0.0017 | 9.70E-22 | 0.000135262 | 95.34948097 |
| rs592483 | T | C | -0.0147 | 0.5716 | 0.0017 | 2.00E-18 | 0.000105829 | 74.7716263 |
| rs6011457 | A | T | -0.0116 | 0.4975 | 0.0017 | 2.70E-11 | 6.73E-05 | 46.56055363 |
| rs6050446 | G | A | 0.0343 | 0.97001 | 0.0047 | 4.40E-13 | 6.84E-05 | 53.2589407 |
| rs6235 | G | C | 0.0175 | 0.2702 | 0.0019 | 1.50E-19 | 0.00012078 | 84.83379501 |
| rs6265 | T | C | -0.0412 | 0.1951 | 0.0021 | 1.00E-86 | 0.000533118 | 384.9070295 |
| rs6443750 | C | T | 0.0148 | 0.8068 | 0.0021 | 3.20E-12 | 6.83E-05 | 49.66893424 |
| rs6448587 | C | A | -0.0167 | 0.1891 | 0.0023 | 2.30E-13 | 8.55E-05 | 52.72022684 |
| rs645040 | T | G | 0.0171 | 0.7762 | 0.002 | 2.50E-18 | 0.000101591 | 73.1025 |
| rs6461115 | G | A | -0.0144 | 0.2285 | 0.0019 | 1.20E-13 | 7.31E-05 | 57.44044321 |
| rs6471941 | A | G | 0.0156 | 0.1684 | 0.0021 | 3.10E-13 | 6.82E-05 | 55.18367347 |
| rs6500208 | A | G | 0.014 | 0.2006 | 0.002 | 4.10E-12 | 6.29E-05 | 49 |
| rs6512302 | C | G | 0.0142 | 0.7511 | 0.002 | 2.10E-12 | 7.54E-05 | 50.41 |
| rs6545714 | A | G | -0.0191 | 0.6139 | 0.0017 | 9.10E-31 | 0.000172939 | 126.2318339 |
| rs6556301 | T | G | -0.0111 | 0.3596 | 0.0018 | 4.10E-10 | 5.67E-05 | 38.02777778 |
| rs6561943 | T | C | 0.0119 | 0.2595 | 0.0019 | 4.20E-10 | 5.44E-05 | 39.22714681 |
| rs657452 | G | A | -0.0188 | 0.6216 | 0.0017 | 7.20E-29 | 0.000166268 | 122.2975779 |
| rs6587552 | G | A | -0.0173 | 0.7591 | 0.002 | 1.60E-17 | 0.000109461 | 74.8225 |
| rs6591407 | A | C | -0.0118 | 0.1861 | 0.0021 | 1.90E-08 | 4.22E-05 | 31.57369615 |
| rs6593688 | G | A | 0.0137 | 0.3733 | 0.0018 | 8.60E-15 | 8.78E-05 | 57.92901235 |
| rs6595205 | G | C | -0.0114 | 0.5305 | 0.0016 | 2.00E-12 | 6.47E-05 | 50.765625 |
| rs663129 | A | G | 0.0545 | 0.2301 | 0.0019 | 1.60E-178 | 0.001052383 | 822.7839335 |
| rs6673081 | C | T | -0.01 | 0.5534 | 0.0018 | 1.80E-08 | 4.94E-05 | 30.86419753 |
| rs6692586 | G | A | -0.0192 | 0.832 | 0.0023 | 1.10E-16 | 0.000103054 | 69.68620038 |
| rs6712 | C | G | 0.0138 | 0.1368 | 0.0025 | 4.40E-08 | 4.50E-05 | 30.4704 |
| rs6764533 | A | G | 0.0116 | 0.359 | 0.0018 | 1.40E-10 | 6.19E-05 | 41.5308642 |
| rs6772756 | G | A | -0.0104 | 0.3372 | 0.0019 | 4.00E-08 | 4.83E-05 | 29.96121884 |
| rs6785245 | C | T | 0.0132 | 0.3969 | 0.0017 | 4.00E-14 | 8.34E-05 | 60.29065744 |
| rs6804842 | G | A | 0.0156 | 0.572 | 0.0017 | 3.60E-21 | 0.000119157 | 84.20761246 |
| rs6815910 | A | T | -0.0128 | 0.5435 | 0.0017 | 1.40E-13 | 8.13E-05 | 56.69204152 |
| rs6841761 | T | G | -0.0131 | 0.5252 | 0.0016 | 6.40E-16 | 8.56E-05 | 67.03515625 |
| rs685870 | C | T | 0.012 | 0.7035 | 0.0019 | 2.40E-10 | 6.01E-05 | 39.88919668 |
| rs6985109 | A | G | -0.0177 | 0.5338 | 0.0017 | 1.50E-26 | 0.000155929 | 108.4048443 |
| rs7024334 | G | T | -0.0138 | 0.7742 | 0.002 | 3.10E-12 | 6.66E-05 | 47.61 |
| rs7025938 | G | C | 0.0166 | 0.3187 | 0.0019 | 3.70E-19 | 0.000119665 | 76.33240997 |
| rs7037266 | A | C | -0.0112 | 0.3739 | 0.0018 | 3.50E-10 | 5.87E-05 | 38.71604938 |
| rs705217 | G | T | -0.0102 | 0.3652 | 0.0018 | 9.30E-09 | 4.82E-05 | 32.11111111 |
| rs7084454 | A | G | 0.0193 | 0.335 | 0.0019 | 4.00E-25 | 0.000165963 | 103.1828255 |
| rs709400 | G | A | -0.015 | 0.3818 | 0.0017 | 4.60E-19 | 0.000106213 | 77.85467128 |
| rs7102454 | C | T | 0.0158 | 0.3435 | 0.0018 | 2.40E-18 | 0.000112592 | 77.04938272 |
| rs7117238 | A | G | -0.0131 | 0.168 | 0.0022 | 2.50E-09 | 4.80E-05 | 35.45661157 |
| rs7124681 | A | C | 0.0263 | 0.4133 | 0.0016 | 3.20E-58 | 0.000335446 | 270.1914063 |
| rs7138803 | A | G | 0.03 | 0.3772 | 0.0017 | 2.30E-71 | 0.000422856 | 311.4186851 |
| rs7144011 | T | G | 0.0282 | 0.2136 | 0.002 | 5.20E-47 | 0.000267161 | 198.81 |
| rs7148846 | G | T | 0.0124 | 0.1896 | 0.0022 | 2.20E-08 | 4.73E-05 | 31.76859504 |
| rs7172627 | G | A | 0.0117 | 0.4719 | 0.0017 | 1.10E-11 | 6.82E-05 | 47.36678201 |
| rs7181498 | C | T | -0.0163 | 0.6309 | 0.0018 | 1.00E-19 | 0.00012374 | 82.00308642 |
| rs7196720 | C | T | -0.0129 | 0.5068 | 0.0017 | 7.30E-14 | 8.32E-05 | 57.58131488 |
| rs7206608 | G | C | 0.0132 | 0.3146 | 0.0019 | 1.30E-12 | 7.51E-05 | 48.26592798 |
| rs7222349 | A | G | 0.0115 | 0.3441 | 0.0018 | 3.30E-10 | 5.97E-05 | 40.81790123 |
| rs7239575 | C | T | -0.0202 | 0.4832 | 0.0017 | 7.40E-32 | 0.00020379 | 141.1903114 |
| rs7318817 | T | C | -0.0155 | 0.6071 | 0.0018 | 2.70E-18 | 0.000114613 | 74.15123457 |
| rs7334078 | C | T | -0.0121 | 0.2882 | 0.0019 | 2.20E-10 | 6.01E-05 | 40.5567867 |
| rs7358465 | T | C | 0.0103 | 0.6781 | 0.0019 | 3.00E-08 | 4.63E-05 | 29.38781163 |
| rs7488867 | T | C | -0.0204 | 0.2639 | 0.002 | 8.40E-24 | 0.000161684 | 104.04 |
| rs7519259 | A | G | 0.0125 | 0.5356 | 0.0017 | 3.80E-13 | 7.77E-05 | 54.06574394 |
| rs7535528 | A | G | -0.0152 | 0.3741 | 0.0018 | 1.40E-16 | 0.000108196 | 71.30864198 |
| rs754635 | G | C | 0.0198 | 0.8873 | 0.0027 | 2.20E-13 | 7.84E-05 | 53.77777778 |
| rs7550711 | T | C | 0.0649 | 0.03058 | 0.005 | 3.20E-38 | 0.000249729 | 168.4804 |
| rs7551507 | T | C | -0.0184 | 0.5633 | 0.0016 | 9.30E-30 | 0.000166567 | 132.25 |
| rs7557796 | C | T | -0.016 | 0.6524 | 0.0018 | 2.30E-19 | 0.000116108 | 79.01234568 |
| rs756717 | A | G | -0.0148 | 0.3973 | 0.0017 | 5.40E-18 | 0.000104899 | 75.79238754 |
| rs7599312 | A | G | -0.0186 | 0.2652 | 0.0019 | 6.90E-24 | 0.000134834 | 95.83379501 |
| rs7615297 | G | C | -0.0149 | 0.1465 | 0.0024 | 5.70E-10 | 5.55E-05 | 38.54340278 |
| rs7626079 | T | C | 0.011 | 0.3434 | 0.0018 | 1.60E-09 | 5.46E-05 | 37.34567901 |
| rs7637852 | G | A | -0.0139 | 0.6951 | 0.0019 | 1.70E-13 | 8.19E-05 | 53.52077562 |
| rs7640424 | T | C | -0.0136 | 0.2969 | 0.0018 | 2.30E-14 | 7.72E-05 | 57.08641975 |
| rs765875 | T | C | -0.0121 | 0.4808 | 0.0017 | 3.00E-12 | 7.31E-05 | 50.66089965 |
| rs7683836 | A | G | -0.0114 | 0.5405 | 0.0017 | 6.30E-11 | 6.46E-05 | 44.96885813 |
| rs7685048 | T | C | -0.0101 | 0.4654 | 0.0017 | 4.10E-09 | 5.08E-05 | 35.29757785 |
| rs768840 | A | G | 0.0114 | 0.4183 | 0.0018 | 2.00E-10 | 6.32E-05 | 40.11111111 |
| rs769449 | A | G | -0.0254 | 0.1161 | 0.0027 | 2.30E-20 | 0.000132414 | 88.49931413 |
| rs7694732 | G | A | -0.0099 | 0.4378 | 0.0017 | 8.70E-09 | 4.82E-05 | 33.91349481 |
| rs7703576 | C | T | 0.0103 | 0.2885 | 0.0019 | 4.80E-08 | 4.36E-05 | 29.38781163 |
| rs7704281 | A | G | 0.0271 | 0.04531 | 0.0041 | 6.50E-11 | 6.35E-05 | 43.68887567 |
| rs7715256 | T | G | -0.0166 | 0.5781 | 0.0016 | 2.20E-24 | 0.000134418 | 107.640625 |
| rs7724675 | A | G | -0.0119 | 0.2238 | 0.0021 | 9.50E-09 | 4.92E-05 | 32.11111111 |
| rs7730004 | T | C | 0.0148 | 0.6693 | 0.0018 | 9.10E-16 | 9.70E-05 | 67.60493827 |
| rs7730898 | A | G | 0.0168 | 0.729 | 0.0018 | 4.50E-20 | 0.000111518 | 87.11111111 |
| rs774246 | G | A | 0.0153 | 0.1444 | 0.0025 | 5.40E-10 | 5.78E-05 | 37.4544 |
| rs7761673 | A | T | -0.0126 | 0.2058 | 0.0021 | 1.90E-09 | 5.19E-05 | 36 |
| rs7780752 | C | T | 0.0139 | 0.36 | 0.0018 | 1.00E-14 | 8.90E-05 | 59.63271605 |
| rs7788008 | A | G | -0.0157 | 0.4445 | 0.0017 | 1.10E-19 | 0.000121726 | 85.29065744 |
| rs7811342 | C | T | -0.0197 | 0.1058 | 0.0029 | 1.10E-11 | 7.34E-05 | 46.14625446 |
| rs7819514 | A | G | -0.0107 | 0.3216 | 0.0018 | 5.70E-09 | 5.00E-05 | 35.33641975 |
| rs7826312 | C | T | 0.0104 | 0.5879 | 0.0017 | 4.90E-10 | 5.24E-05 | 37.42560554 |
| rs7844647 | C | T | -0.0123 | 0.2681 | 0.0018 | 2.80E-11 | 5.94E-05 | 46.69444444 |
| rs7869771 | C | A | -0.014 | 0.2647 | 0.0019 | 4.90E-13 | 7.63E-05 | 54.29362881 |
| rs7871866 | C | G | 0.0187 | 0.1531 | 0.0024 | 2.30E-14 | 9.07E-05 | 60.71006944 |
| rs7899106 | G | A | 0.0331 | 0.04777 | 0.0037 | 1.00E-18 | 9.97E-05 | 80.02994887 |
| rs7903146 | T | C | -0.0181 | 0.2912 | 0.0018 | 1.30E-23 | 0.000135239 | 101.1141975 |
| rs7925214 | T | C | 0.0147 | 0.5133 | 0.0018 | 4.40E-17 | 0.000107969 | 66.69444444 |
| rs7970953 | A | G | 0.0135 | 0.29 | 0.0018 | 9.80E-14 | 7.51E-05 | 56.25 |
| rs7983065 | T | C | -0.0148 | 0.4503 | 0.0017 | 8.90E-18 | 0.000108438 | 75.79238754 |
| rs7998796 | G | A | 0.0105 | 0.3373 | 0.0018 | 1.10E-08 | 4.93E-05 | 34.02777778 |
| rs8027205 | G | C | -0.0108 | 0.3967 | 0.0018 | 1.40E-09 | 5.58E-05 | 36 |
| rs8036040 | A | C | 0.0109 | 0.4932 | 0.0017 | 2.70E-10 | 5.94E-05 | 41.11072664 |
| rs8047395 | A | G | 0.0642 | 0.5061 | 0.0017 | 1.00E-200 | 0.002060513 | 1426.17301 |
| rs806600 | G | A | -0.0095 | 0.475 | 0.0017 | 3.30E-08 | 4.50E-05 | 31.2283737 |
| rs8071182 | A | G | 0.0133 | 0.1735 | 0.0022 | 2.10E-09 | 5.07E-05 | 36.54752066 |
| rs8090983 | G | A | 0.0118 | 0.3314 | 0.0018 | 2.00E-10 | 6.17E-05 | 42.97530864 |
| rs8097672 | T | A | 0.02 | 0.1528 | 0.0025 | 8.40E-16 | 0.000103562 | 64 |
| rs8097783 | A | G | -0.0389 | 0.07554 | 0.0031 | 7.20E-36 | 0.000211346 | 157.4620187 |
| rs8123881 | G | A | 0.0196 | 0.1299 | 0.0024 | 4.40E-16 | 8.68E-05 | 66.69444444 |
| rs8181823 | C | A | 0.0127 | 0.7614 | 0.002 | 4.10E-10 | 5.86E-05 | 40.3225 |
| rs818524 | C | T | 0.0106 | 0.6939 | 0.0019 | 3.40E-08 | 4.77E-05 | 31.12465374 |
| rs8192675 | C | T | 0.0152 | 0.2888 | 0.0018 | 1.40E-17 | 9.49E-05 | 71.30864198 |
| rs825688 | T | C | -0.0095 | 0.456 | 0.0017 | 4.70E-08 | 4.48E-05 | 31.2283737 |
| rs845084 | A | G | 0.014 | 0.2678 | 0.002 | 1.30E-12 | 7.69E-05 | 49 |
| rs852056 | C | T | -0.0128 | 0.7584 | 0.002 | 1.80E-10 | 6.00E-05 | 40.96 |
| rs865809 | G | A | -0.0127 | 0.7678 | 0.002 | 5.40E-10 | 5.75E-05 | 40.3225 |
| rs872281 | T | C | -0.0151 | 0.1728 | 0.0023 | 4.70E-11 | 6.52E-05 | 43.1020794 |
| rs876605 | G | A | -0.0108 | 0.7352 | 0.002 | 3.40E-08 | 4.54E-05 | 29.16 |
| rs879620 | T | C | 0.0231 | 0.6179 | 0.0018 | 5.30E-38 | 0.00025197 | 164.6944444 |
| rs889398 | T | C | -0.0196 | 0.4247 | 0.0016 | 1.30E-32 | 0.000187724 | 150.0625 |
| rs895330 | G | C | -0.0201 | 0.1924 | 0.0023 | 5.50E-19 | 0.000125552 | 76.37240076 |
| rs901630 | T | C | -0.0146 | 0.3973 | 0.0017 | 1.90E-18 | 0.000102083 | 73.75778547 |
| rs902695 | A | G | -0.0103 | 0.4798 | 0.0017 | 2.20E-09 | 5.30E-05 | 36.70934256 |
| rs9294260 | A | G | 0.0147 | 0.4731 | 0.0016 | 1.80E-19 | 0.000107732 | 84.41015625 |
| rs9300422 | G | A | -0.0103 | 0.6903 | 0.0018 | 4.00E-09 | 4.54E-05 | 32.74382716 |
| rs930295 | C | A | -0.0211 | 0.8417 | 0.0023 | 1.00E-19 | 0.000118641 | 84.16068053 |
| rs9304665 | A | T | 0.0229 | 0.7633 | 0.002 | 2.90E-29 | 0.000189494 | 131.1025 |
| rs934224 | T | C | 0.0107 | 0.7399 | 0.002 | 4.70E-08 | 4.41E-05 | 28.6225 |
| rs9362662 | G | A | -0.0112 | 0.5201 | 0.0017 | 1.20E-10 | 6.26E-05 | 43.40484429 |
| rs9367368 | C | T | -0.0121 | 0.3033 | 0.0018 | 1.00E-11 | 6.19E-05 | 45.1882716 |
| rs9370261 | T | C | 0.0231 | 0.04601 | 0.0042 | 3.40E-08 | 4.68E-05 | 30.25 |
| rs9379827 | A | C | -0.0132 | 0.2409 | 0.0019 | 6.90E-12 | 6.37E-05 | 48.26592798 |
| rs9408882 | A | G | -0.0093 | 0.4594 | 0.0016 | 1.30E-08 | 4.30E-05 | 33.78515625 |
| rs946824 | C | T | -0.0206 | 0.859 | 0.0026 | 1.10E-15 | 0.000102796 | 62.77514793 |
| rs947612 | A | G | -0.0116 | 0.7516 | 0.002 | 5.60E-09 | 5.02E-05 | 33.64 |
| rs9478671 | G | A | 0.012 | 0.2087 | 0.0021 | 1.70E-08 | 4.76E-05 | 32.65306122 |
| rs9522285 | A | G | 0.0127 | 0.4143 | 0.0017 | 2.50E-13 | 7.83E-05 | 55.80968858 |
| rs9538162 | C | T | -0.0156 | 0.4138 | 0.0018 | 4.80E-19 | 0.000118063 | 75.11111111 |
| rs9547153 | G | A | 0.0098 | 0.3839 | 0.0017 | 8.70E-09 | 4.54E-05 | 33.23183391 |
| rs9571687 | A | C | -0.0129 | 0.329 | 0.0018 | 2.80E-12 | 7.35E-05 | 51.36111111 |
| rs9615905 | T | C | 0.011 | 0.45 | 0.0017 | 2.70E-10 | 0.000059895 | 41.86851211 |
| rs962273 | C | T | 0.0137 | 0.7057 | 0.0019 | 2.60E-13 | 7.80E-05 | 51.99168975 |
| rs9650755 | G | A | 0.0154 | 0.2664 | 0.002 | 2.80E-15 | 9.27E-05 | 59.29 |
| rs9688431 | C | T | -0.0231 | 0.06034 | 0.0035 | 2.40E-11 | 6.05E-05 | 43.56 |
| rs977747 | G | T | -0.0169 | 0.5949 | 0.0017 | 1.30E-24 | 0.000137661 | 98.82698962 |
| rs9783858 | T | C | 0.0091 | 0.5191 | 0.0017 | 3.30E-08 | 4.13E-05 | 28.65397924 |
| rs9806742 | A | G | 0.0208 | 0.8826 | 0.0026 | 1.40E-15 | 8.97E-05 | 64 |
| rs9816226 | T | A | 0.0323 | 0.8199 | 0.0021 | 1.60E-52 | 0.000308113 | 236.5736961 |
| rs9845966 | G | T | -0.0105 | 0.5479 | 0.0017 | 2.50E-10 | 5.46E-05 | 38.14878893 |
| rs987237 | G | A | 0.0409 | 0.1803 | 0.0021 | 9.30E-84 | 0.000494456 | 379.3219955 |
| rs9926784 | C | T | -0.0258 | 0.1822 | 0.0021 | 9.90E-35 | 0.000198365 | 150.9387755 |
| rs9927848 | A | C | -0.0122 | 0.7326 | 0.002 | 6.40E-10 | 5.83E-05 | 37.21 |
| rs9951619 | G | T | 0.0156 | 0.7643 | 0.002 | 1.40E-15 | 8.77E-05 | 60.84 |
| rs998732 | G | A | -0.0171 | 0.1578 | 0.0022 | 2.00E-14 | 7.77E-05 | 60.41528926 |
| rs9989141 | T | C | 0.0162 | 0.6387 | 0.0017 | 3.60E-21 | 0.000121123 | 90.80968858 |
| rs999889 | A | G | -0.0108 | 0.2818 | 0.0019 | 1.40E-08 | 4.72E-05 | 32.31024931 |

**Supplementary Table 4. List of instrumental SNPs to calculate the effect estimates of T2D on LS (after deleting outliers).**

| SNP | A1 | A2 | Beta | EAF | SE | P | F |
| --- | --- | --- | --- | --- | --- | --- | --- |
| rs10077431 | A | C | -0.0487 | 0.214668 | 0.0089 | 4.75E-08 | 29.94180028 |
| rs1009358 | C | T | -0.0545 | 0.377278 | 0.008 | 9.81E-12 | 46.41015625 |
| rs10100265 | C | A | -0.0491 | 0.61049 | 0.0079 | 6.29E-10 | 38.62858516 |
| rs10114341 | C | T | -0.0409 | 0.440754 | 0.0072 | 1.15E-08 | 32.26871142 |
| rs10401969 | C | T | 0.0921 | 0.076586 | 0.0133 | 4.13E-12 | 47.95302165 |
| rs1050226 | G | A | -0.0491 | 0.406792 | 0.0074 | 3.34E-11 | 44.02501826 |
| rs1061813 | A | G | -0.0429 | 0.537119 | 0.0073 | 3.37E-09 | 34.5357478 |
| rs10811661 | C | T | -0.1569 | 0.173605 | 0.0098 | 4.13E-58 | 256.3266347 |
| rs10830963 | G | C | 0.0909 | 0.275768 | 0.008 | 5.85E-30 | 129.1064063 |
| rs10842994 | T | C | -0.0755 | 0.197025 | 0.0091 | 1.02E-16 | 68.83528559 |
| rs10974438 | C | A | 0.0591 | 0.351215 | 0.0075 | 3.01E-15 | 62.0944 |
| rs11048456 | T | C | -0.0488 | 0.756179 | 0.0082 | 2.97E-09 | 35.41701368 |
| rs11098676 | C | T | 0.054 | 0.787639 | 0.0096 | 2.03E-08 | 31.640625 |
| rs11107116 | T | G | 0.0467 | 0.219714 | 0.0085 | 3.75E-08 | 30.18532872 |
| rs11257655 | T | C | 0.0737 | 0.206773 | 0.0087 | 1.97E-17 | 71.76231999 |
| rs1127655 | T | C | -0.0438 | 0.529064 | 0.0079 | 2.47E-08 | 30.7393046 |
| rs11708067 | G | A | -0.0965 | 0.23899 | 0.0086 | 5.93E-29 | 125.9092753 |
| rs11774915 | T | C | 0.0495 | 0.337129 | 0.0086 | 8.73E-09 | 33.12939427 |
| rs11926707 | C | T | 0.0463 | 0.625556 | 0.0082 | 1.69E-08 | 31.88117192 |
| rs12088739 | G | A | -0.0884 | 0.089848 | 0.013 | 9.79E-12 | 46.24 |
| rs12299509 | G | A | 0.0467 | 0.478622 | 0.0073 | 2.09E-10 | 40.92493901 |
| rs12617659 | T | C | -0.0685 | 0.147238 | 0.0103 | 2.83E-11 | 44.22895655 |
| rs12681990 | C | T | 0.0634 | 0.16373 | 0.0096 | 3.62E-11 | 43.61501736 |
| rs12910825 | G | A | 0.0517 | 0.360391 | 0.0074 | 2.16E-12 | 48.81099343 |
| rs12945601 | C | T | -0.048 | 0.613603 | 0.008 | 1.72E-09 | 36 |
| rs12970134 | A | G | 0.0555 | 0.26512 | 0.008 | 5.31E-12 | 48.12890625 |
| rs13239186 | T | C | 0.0539 | 0.302029 | 0.0085 | 2.70E-10 | 40.21051903 |
| rs1333039 | C | G | 0.0534 | 0.598788 | 0.0074 | 5.64E-13 | 52.07377648 |
| rs13389219 | T | C | -0.0722 | 0.394368 | 0.0074 | 2.11E-22 | 95.19430241 |
| rs1359790 | A | G | -0.0796 | 0.2867 | 0.008 | 2.80E-23 | 99.0025 |
| rs1496653 | G | A | -0.0769 | 0.204782 | 0.0088 | 2.57E-18 | 76.3637655 |
| rs1552224 | C | A | -0.1034 | 0.15421 | 0.0101 | 8.64E-25 | 104.8089403 |
| rs17086692 | T | G | -0.0467 | 0.313426 | 0.0084 | 2.48E-08 | 30.90830499 |
| rs17168486 | T | C | 0.0742 | 0.173603 | 0.0094 | 2.18E-15 | 62.30918968 |
| rs17334919 | T | C | -0.1398 | 0.100218 | 0.0128 | 6.69E-28 | 119.2873535 |
| rs17405722 | A | G | 0.087 | 0.074153 | 0.0146 | 2.28E-09 | 35.50853819 |
| rs17411031 | G | C | -0.045 | 0.261729 | 0.0081 | 3.04E-08 | 30.86419753 |
| rs17631783 | T | C | -0.0487 | 0.26346 | 0.0089 | 3.95E-08 | 29.94180028 |
| rs17791483 | G | A | -0.102 | 0.062588 | 0.0147 | 3.42E-12 | 48.14660558 |
| rs1801214 | T | C | 0.0903 | 0.599585 | 0.0074 | 5.52E-34 | 148.9059533 |
| rs2191348 | T | G | 0.0652 | 0.546935 | 0.0073 | 3.44E-19 | 79.7718146 |
| rs2237892 | T | C | -0.096 | 0.06249 | 0.0157 | 8.75E-10 | 37.38894073 |
| rs2246012 | C | T | 0.0527 | 0.164823 | 0.0094 | 2.43E-08 | 31.4315301 |
| rs2261181 | T | C | 0.0985 | 0.09647 | 0.0118 | 9.18E-17 | 69.68004884 |
| rs2292662 | T | C | -0.0629 | 0.151272 | 0.0111 | 1.24E-08 | 32.11111111 |
| rs2294120 | G | A | -0.0443 | 0.455879 | 0.0079 | 1.62E-08 | 31.44512097 |
| rs2296173 | G | A | 0.065 | 0.212011 | 0.0087 | 7.66E-14 | 55.81979125 |
| rs2299383 | T | C | 0.0412 | 0.423455 | 0.0073 | 1.49E-08 | 31.85288047 |
| rs2421016 | T | C | -0.0458 | 0.473761 | 0.0071 | 1.48E-10 | 41.611585 |
| rs243019 | C | T | 0.0566 | 0.455831 | 0.0071 | 2.29E-15 | 63.55008927 |
| rs244415 | A | G | -0.0467 | 0.412872 | 0.0079 | 3.88E-09 | 34.94456017 |
| rs2493394 | G | A | 0.073 | 0.107338 | 0.0113 | 1.15E-10 | 41.73388676 |
| rs2616132 | A | G | 0.0455 | 0.474257 | 0.0078 | 6.58E-09 | 34.02777778 |
| rs2633310 | T | G | -0.0443 | 0.435073 | 0.0079 | 2.37E-08 | 31.44512097 |
| rs2796441 | A | G | -0.0715 | 0.416458 | 0.0073 | 1.96E-22 | 95.93263276 |
| rs2820426 | G | A | 0.0521 | 0.610058 | 0.0073 | 1.30E-12 | 50.93657347 |
| rs2867125 | C | T | 0.0601 | 0.827825 | 0.0096 | 4.33E-10 | 39.19281684 |
| rs2908282 | A | G | 0.0552 | 0.177395 | 0.0094 | 4.25E-09 | 34.48438207 |
| rs2925979 | C | T | -0.0534 | 0.70085 | 0.0078 | 9.06E-12 | 46.86982249 |
| rs2972144 | G | A | 0.0913 | 0.645367 | 0.0075 | 2.55E-34 | 148.1900444 |
| rs302864 | A | G | 0.071 | 0.087026 | 0.0127 | 2.46E-08 | 31.25426251 |
| rs340874 | C | T | 0.0626 | 0.563904 | 0.0073 | 8.41E-18 | 73.5364984 |
| rs348330 | A | G | -0.0487 | 0.633451 | 0.0081 | 1.86E-09 | 36.14830056 |
| rs3802177 | A | G | -0.1217 | 0.311281 | 0.008 | 2.32E-52 | 231.4201563 |
| rs3887925 | T | C | 0.0474 | 0.553172 | 0.0079 | 2.47E-09 | 36 |
| rs4472028 | C | T | -0.0453 | 0.55575 | 0.0071 | 2.08E-10 | 40.70799445 |
| rs4502156 | C | T | -0.0411 | 0.435857 | 0.0073 | 1.66E-08 | 31.69844248 |
| rs459193 | G | A | 0.0711 | 0.745338 | 0.0083 | 8.81E-18 | 73.38089708 |
| rs4810426 | T | C | 0.0726 | 0.096789 | 0.013 | 2.15E-08 | 31.18792899 |
| rs4823182 | G | A | 0.0482 | 0.335748 | 0.0077 | 3.36E-10 | 39.18434812 |
| rs4865796 | A | G | 0.053 | 0.69309 | 0.0078 | 1.33E-11 | 46.17028271 |
| rs4932143 | C | G | -0.0568 | 0.720944 | 0.0087 | 5.51E-11 | 42.62438895 |
| rs516946 | C | T | 0.0824 | 0.760633 | 0.0085 | 3.16E-22 | 93.97591696 |
| rs5215 | T | C | -0.0678 | 0.639941 | 0.0073 | 2.09E-20 | 86.26083693 |
| rs6059662 | G | A | 0.0446 | 0.663176 | 0.0079 | 1.51E-08 | 31.87245634 |
| rs6066138 | A | G | -0.049 | 0.278362 | 0.0082 | 1.93E-09 | 35.70791196 |
| rs61953351 | T | G | -0.07 | 0.249902 | 0.0091 | 1.98E-14 | 59.17159763 |
| rs622217 | C | T | -0.0485 | 0.483932 | 0.0077 | 3.13E-10 | 39.67363805 |
| rs6515236 | C | A | -0.0504 | 0.24933 | 0.0091 | 3.34E-08 | 30.67455621 |
| rs67232546 | T | C | 0.0596 | 0.209222 | 0.0096 | 4.66E-10 | 38.54340278 |
| rs6795735 | T | C | -0.0558 | 0.410912 | 0.0073 | 1.63E-14 | 58.42822293 |
| rs6808574 | C | T | 0.0552 | 0.609626 | 0.0076 | 4.39E-13 | 52.7534626 |
| rs6878122 | A | G | -0.0564 | 0.681791 | 0.0079 | 1.19E-12 | 50.96875501 |
| rs7138300 | T | C | -0.0443 | 0.556835 | 0.0072 | 5.65E-10 | 37.85667438 |
| rs7144011 | T | G | 0.0482 | 0.221063 | 0.0085 | 1.64E-08 | 32.15557093 |
| rs7177055 | A | G | 0.0647 | 0.718289 | 0.0079 | 2.75E-16 | 67.0740266 |
| rs7185735 | G | A | 0.1056 | 0.397306 | 0.0073 | 1.59E-47 | 209.2580221 |
| rs7240767 | C | T | 0.0451 | 0.383677 | 0.0081 | 2.16E-08 | 31.00152416 |
| rs72892910 | T | G | 0.0648 | 0.172394 | 0.0099 | 6.43E-11 | 42.84297521 |
| rs735949 | C | T | -0.0711 | 0.14115 | 0.0106 | 1.95E-11 | 44.99118904 |
| rs7561798 | G | A | 0.04 | 0.482171 | 0.0072 | 2.79E-08 | 30.86419753 |
| rs7572970 | G | A | 0.059 | 0.722047 | 0.0087 | 1.39E-11 | 45.99022328 |
| rs7651090 | G | A | 0.1204 | 0.313377 | 0.0076 | 3.85E-57 | 250.9722992 |
| rs7674212 | T | G | -0.0465 | 0.408864 | 0.0075 | 6.18E-10 | 38.44 |
| rs7685296 | T | C | -0.0511 | 0.279365 | 0.0081 | 2.32E-10 | 39.79896357 |
| rs7729395 | T | C | 0.1373 | 0.050941 | 0.016 | 1.10E-17 | 73.63785156 |
| rs7756992 | G | A | 0.1297 | 0.266896 | 0.0078 | 6.00E-62 | 276.4972058 |
| rs7786095 | G | A | -0.0743 | 0.10386 | 0.0129 | 9.64E-09 | 33.174028 |
| rs780094 | C | T | 0.0692 | 0.612845 | 0.0074 | 5.16E-21 | 87.4477721 |
| rs7841082 | T | C | -0.042 | 0.438276 | 0.0077 | 4.94E-08 | 29.75206612 |
| rs7845219 | C | T | -0.0422 | 0.492786 | 0.0072 | 4.54E-09 | 34.35262346 |
| rs7903146 | T | C | 0.3059 | 0.291585 | 0.0077 | 1.00E-200 | 1578.256198 |
| rs7923866 | T | C | -0.0972 | 0.378775 | 0.0074 | 9.34E-40 | 172.531775 |
| rs7929543 | C | A | 0.0828 | 0.08316 | 0.0138 | 2.20E-09 | 36 |
| rs8068804 | A | G | 0.0587 | 0.325097 | 0.0078 | 4.41E-14 | 56.63527285 |
| rs8108269 | G | T | 0.0644 | 0.281015 | 0.0079 | 3.11E-16 | 66.45345297 |
| rs825476 | T | C | 0.0524 | 0.580549 | 0.0073 | 6.80E-13 | 51.52486395 |
| rs849135 | A | G | -0.0999 | 0.499052 | 0.0072 | 1.04E-43 | 192.515625 |
| rs853974 | C | T | -0.0601 | 0.737586 | 0.0088 | 7.86E-12 | 46.64269112 |
| rs9369425 | A | G | -0.0546 | 0.708185 | 0.0085 | 1.13E-10 | 41.2617301 |
| rs940904 | A | G | 0.0499 | 0.743373 | 0.0083 | 2.08E-09 | 36.14472347 |
| rs963740 | T | A | -0.0479 | 0.294299 | 0.0086 | 2.23E-08 | 31.02230936 |
| rs982077 | G | A | -0.0453 | 0.565521 | 0.0072 | 2.58E-10 | 39.58506944 |
| rs9844972 | C | G | 0.0956 | 0.069723 | 0.0148 | 1.03E-10 | 41.72461651 |
| rs9894220 | G | A | -0.0585 | 0.43374 | 0.0079 | 1.52E-13 | 54.83496235 |
| rs9911983 | T | C | 0.0397 | 0.566573 | 0.0073 | 4.82E-08 | 29.57571777 |
| rs993380 | G | A | -0.0507 | 0.66555 | 0.0081 | 4.59E-10 | 39.17832647 |
| rs9940149 | A | G | -0.058 | 0.178556 | 0.0095 | 9.29E-10 | 37.27423823 |

**Supplementary Table 5. List of instrumental SNPs to calculate the effect estimates of LS on T1D.**

| SNP | A1 | A2 | Beta | EAF | chr | P | SE | F |
| --- | --- | --- | --- | --- | --- | --- | --- | --- |
| rs112457525 | G | A | 0.888212 | NA | 6 | 1.00E-33 | 0.0733788 | 146.5183645 |
| rs6457710 | A | G | -0.359606 | NA | 6 | 4.74E-21 | 0.0381961 | 88.63715648 |
| rs707931 | A | G | 0.330328 | NA | 6 | 6.75E-09 | 0.0569812 | 33.60683345 |
| rs9275158 | G | A | 0.253234 | NA | 6 | 1.12E-15 | 0.0316025 | 64.20977529 |

**Supplementary Table 6. List of instrumental SNPs to calculate the effect estimates of LS on T2D.**

| SNP | A1 | A2 | Beta | EAF | P | SE | F |
| --- | --- | --- | --- | --- | --- | --- | --- |
| rs11203143 | C | T | 0.214752 | NA | 2.24E-06 | 0.0453994 | 22.37557517 |
| rs12412095 | A | G | 0.151848 | NA | 3.39E-06 | 0.0326847 | 21.58386153 |
| rs13027870 | G | A | -0.166587 | NA | 1.65E-06 | 0.0347656 | 22.96057482 |
| rs1678043 | G | A | 0.18104 | NA | 2.86E-07 | 0.0352748 | 26.34025419 |
| rs2253820 | T | C | -0.220175 | NA | 1.59E-06 | 0.0458787 | 23.03105345 |
| rs2290912 | C | T | -0.16493 | NA | 2.91E-06 | 0.0352631 | 21.87551774 |
| rs57857258（回文） | G | C | -0.546467 | NA | 1.57E-06 | 0.113796 | 23.06077448 |
| rs6534822 | G | A | -0.258541 | NA | 6.59E-07 | 0.0519889 | 24.73076732 |
| rs7247731 | C | T | -0.305341 | NA | 6.58E-08 | 0.0565194 | 29.18603921 |

**Supplementary Table 7. List of instrumental SNPs to calculate the effect estimates of LS on BMI.**

| SNP | A1 | A2 | Beta | EAF | Chr | P | SE | F |
| --- | --- | --- | --- | --- | --- | --- | --- | --- |
| rs11203143 | C | T | 0.214752 | NA | 10 | 2.24E-06 | 0.0453994 | 22.37557517 |
| rs13027870 | G | A | -0.166587 | NA | 2 | 1.65E-06 | 0.0347656 | 22.96057482 |
| rs1678043 | G | A | 0.18104 | NA | 10 | 2.86E-07 | 0.0352748 | 26.34025419 |
| rs2253820 | T | C | -0.220175 | NA | 17 | 1.59E-06 | 0.0458787 | 23.03105345 |
| rs2290912 | C | T | -0.16493 | NA | 2 | 2.91E-06 | 0.0352631 | 21.87551774 |
| rs6534822 | G | A | -0.258541 | NA | 4 | 6.59E-07 | 0.0519889 | 24.73076732 |

**Supplementary Table 8.** Heterogeneity results by Cochran’s Q test of different exposures on LS.

| Exposures | Outcomes | Cochran's Q test | Heterogeneity p-value |
| --- | --- | --- | --- |
| Type 1 diabetes | LS | IVW | 6.09505E-06 |
|  | MR Egger | 1.12574E-05 |
| Type 2 diabetes | IVW | 1.16E-05 |
|  | MR Egger | 2.09724E-05 |
| Type 2 diabetes（After removing outliers） | IVW | 0.9714 |
|  | MR Egger | 0.97924 |
| BMI | IVW | 0.0179 |
|  | MR Egger | 0.0168 |

**Supplementary Table 9.** Pleiotropy results of MR analysis of LS on different exposures on LS.

| Exposures | Outcome | SE | intercept | p-Value |
| --- | --- | --- | --- | --- |
| T1D | LS | 0.019 | -0.022 | 0.2596 |
| T2D | 0.010 | 0.016 | 0.1119 |
| BMI | 0.005 | -0.0022 | 0.6505 |
| T2D(after deleting outliers) | 0.008 | 0.0081 | 0.1133 |

**Supplementary Table 10.** Heterogeneity results by Cochran’s Q test of LS on different outcomes.

| Exposures | Outcomes | Cochran's Q test | Heterogeneity p-value |
| --- | --- | --- | --- |
| LS | Type 1 diabetes | IVW | 1.64552E-48 |
|  | MR Egger | 2.51708E-27 |
| Type 2 diabetes | IVW | 0.004995697 |
|  | MR Egger | 0.0054772 |
| BMI | IVW | 8.40725E-10 |
|  | MR Egger | 9.00117E-07 |

**Supplementary Table 11.** Pleiotropy results of MR analysis of LS on different outcomes.

| Exposure | Outcomes | SE | intercept | p-Value |
| --- | --- | --- | --- | --- |
| LS | T1D | 0.497 | -0.6428 | 0.325 |
| T2D | 0.029 | -0.0236 | 0.4537 |
| BMI | 0.016 | -0.0226 | 0.2228 |
